# Supplementary material
Source: publisher figshare collection journal article supplement (https://gsajournals.figshare.com/ndownloader/files/23759447)
Supplement: Supplementary file 1 [file 23759447]

## Sheet: Table S1
Table S1 : Sequenced tissues.
Number of reads per RNA-seq experiment
	AG	Head	1st Instar Larvae	SG	Testis
D. melanogaster
RAL304	19269534	46942014	36653341	36083767	29244259
RAL307	27459417	35107088	35158343	41507677	34280653
RAL357	22882690	45734727	39615985	35532457	11985192
RAL360	17080340	55561295	44807587	42838334	48980611
RAL399	21870664	44739439	63050981	38928850	45301252
RAL517	15972681	43018115	35840973	43903418	28772073
RAL304x307	32828487	40231912	42679332	41787811	35962156
RAL357xRAL399	35130907	38503596	42884598	42865106	32690274
RAL360xRAL517	30221452	49315162	44745954	38553123	37568812
D. simulans
Lara 10	20730423	35314742	42898982	34866643	30894236
Fair 7		49908264	27555293	38169836	30415463
W501					30030010
D. yakuba
TAI18E2	31354107	32522692	40874472	36448689	30950801
CY28		32316508	32672546	39855993	30539086

## Sheet: Table S2
Table S2: FBgn list of all orthologs
D.melanogaster	D.simulans	D.yakuba
FBgn0026189	FBgn0185072	FBgn0238918
FBgn0034464	FBgn0183223	FBgn0229844
FBgn0030722	FBgn0187426	FBgn0233549
FBgn0035199	FBgn0185311	FBgn0238413
FBgn0026206	FBgn0188514	FBgn0233391
FBgn0050428	FBgn0183662	FBgn0232074
FBgn0259979	FBgn0182154	FBgn0068386
FBgn0038248	FBgn0191881	FBgn0243458
FBgn0014127	FBgn0193142	FBgn0230342
FBgn0041195	FBgn0195205	FBgn0235993
FBgn0037483	FBgn0191403	FBgn0242007
FBgn0035916	FBgn0184696	FBgn0238559
FBgn0036080	FBgn0185921	FBgn0238984
FBgn0037687	FBgn0190134	FBgn0242994
FBgn0037470	FBgn0191005	FBgn0242871
FBgn0040281	FBgn0270834	FBgn0238399
FBgn0035152	FBgn0185231	FBgn0238290
FBgn0262614	FBgn0192297	FBgn0241914
FBgn0035423	FBgn0185447	FBgn0068374
FBgn0039537	FBgn0192782	FBgn0240909
FBgn0031977	FBgn0194877	FBgn0068248
FBgn0040096	FBgn0195122	FBgn0235916
FBgn0039719	FBgn0192914	FBgn0241046
FBgn0263873	FBgn0195584	FBgn0230972
FBgn0264493	FBgn0191935	FBgn0227952
FBgn0262870	FBgn0184961	FBgn0237903
FBgn0016034	FBgn0186721	FBgn0067951
FBgn0060296	FBgn0196225	FBgn0229212
FBgn0028424	FBgn0182937	FBgn0068133
FBgn0261617	FBgn0187689	FBgn0233014
FBgn0011283	FBgn0193891	FBgn0235773
FBgn0259821	FBgn0193893	FBgn0242467
FBgn0085432	FBgn0067493	FBgn0232135
FBgn0003165	FBgn0192280	FBgn0241898
FBgn0032127	FBgn0194991	FBgn0236236
FBgn0261266	FBgn0193556	FBgn0230308
FBgn0034066	FBgn0196860	FBgn0231729
FBgn0011335	FBgn0186040	FBgn0239122
FBgn0011586	FBgn0187451	FBgn0234894
FBgn0036663	FBgn0184173	FBgn0239416
FBgn0285892	FBgn0182462	FBgn0236665
FBgn0036660	FBgn0184175	FBgn0239417
FBgn0000566	FBgn0183149	FBgn0229765
FBgn0033716	FBgn0182622	FBgn0230180
FBgn0036762	FBgn0186405	FBgn0237260
FBgn0285952	FBgn0183568	FBgn0067981
FBgn0003189	FBgn0015169	FBgn0234761
FBgn0022774	FBgn0183996	FBgn0239697
FBgn0040502	FBgn0084900	FBgn0084220
FBgn0015321	FBgn0185893	FBgn0238156
FBgn0002284	FBgn0184185	FBgn0239432
FBgn0037891	FBgn0190266	FBgn0243128
FBgn0250746	FBgn0191116	FBgn0242372
FBgn0086710	FBgn0193210	FBgn0068072
FBgn0264707	FBgn0182771	FBgn0238360
FBgn0260938	FBgn0195999	FBgn0233562
FBgn0030701	FBgn0188812	FBgn0234711
FBgn0023023	FBgn0191284	FBgn0228020
FBgn0085407	FBgn0193914	FBgn0235796
FBgn0263391	FBgn0196621	FBgn0231494
FBgn0028490	FBgn0193577	FBgn0230528
FBgn0000405	FBgn0187170	FBgn0229622
FBgn0034835	FBgn0183484	FBgn0231886
FBgn0034398	FBgn0196653	FBgn0231524
FBgn0061356	FBgn0182526	FBgn0230564
FBgn0262366	FBgn0269446	FBgn0276142
FBgn0002629	FBgn0082720	FBgn0082693
FBgn0033886	FBgn0197011	FBgn0231009
FBgn0041622	FBgn0184412	FBgn0237409
FBgn0045495	FBgn0193894	FBgn0235776
FBgn0266418	FBgn0192428	FBgn0228189
FBgn0085489	FBgn0182974	FBgn0229613
FBgn0032010	FBgn0193829	FBgn0228909
FBgn0029990	FBgn0187770	FBgn0234953
FBgn0010385	FBgn0066167	FBgn0239073
FBgn0026370	FBgn0182868	FBgn0229494
FBgn0263980	FBgn0182871	FBgn0229498
FBgn0014877	FBgn0182734	FBgn0230285
FBgn0264386	FBgn0187838	FBgn0234000
FBgn0032366	FBgn0193580	FBgn0230560
FBgn0026380	FBgn0192290	FBgn0241907
FBgn0085422	FBgn0194163	FBgn0232514
FBgn0035483	FBgn0185498	FBgn0238656
FBgn0264922	FBgn0193925	FBgn0235805
FBgn0034509	FBgn0183257	FBgn0229883
FBgn0020307	FBgn0183396	FBgn0231792
FBgn0259823	FBgn0190508	FBgn0241411
FBgn0259110	FBgn0068590	FBgn0233555
FBgn0027279	FBgn0195750	FBgn0235376
FBgn0264606	FBgn0185090	FBgn0238941
FBgn0262114	FBgn0182504	FBgn0236707
FBgn0034423	FBgn0183187	FBgn0229804
FBgn0004656	FBgn0187769	FBgn0234952
FBgn0262116	FBgn0189229	FBgn0239892
FBgn0034475	FBgn0183230	FBgn0229853
FBgn0034314	FBgn0183096	FBgn0229714
FBgn0264339	FBgn0183505	FBgn0231909
FBgn0010590	FBgn0187660	FBgn0231730
FBgn0000053	FBgn0193920	FBgn0235802
FBgn0051950	FBgn0194581	FBgn0235621
FBgn0032397	FBgn0193552	FBgn0230259
FBgn0039480	FBgn0268111	FBgn0228446
FBgn0052656	FBgn0188636	FBgn0276553
FBgn0020617	FBgn0183288	FBgn0229915
FBgn0050069	FBgn0182789	FBgn0231225
FBgn0035268	FBgn0185353	FBgn0238459
FBgn0045842	FBgn0193381	FBgn0236754
FBgn0038118	FBgn0190396	FBgn0243280
FBgn0003380	FBgn0187317	FBgn0233132
FBgn0034098	FBgn0186895	FBgn0231710
FBgn0051163	FBgn0192386	FBgn0228150
FBgn0033727	FBgn0182637	FBgn0230194
FBgn0263392	FBgn0185086	FBgn0238937
FBgn0028411	FBgn0196324	FBgn0068112
FBgn0034259	FBgn0196748	FBgn0231610
FBgn0040666	FBgn0196238	FBgn0068455
FBgn0034816	FBgn0183475	FBgn0231875
FBgn0032632	FBgn0193295	FBgn0230841
FBgn0000527	FBgn0262091	FBgn0242095
FBgn0019925	FBgn0191833	FBgn0243414
FBgn0000447	FBgn0192317	FBgn0241937
FBgn0053181	FBgn0188487	FBgn0233354
FBgn0035558	FBgn0185548	FBgn0068485
FBgn0027498	FBgn0188583	FBgn0233465
FBgn0015600	FBgn0194174	FBgn0232530
FBgn0035842	FBgn0184740	FBgn0237687
FBgn0262005	FBgn0191711	FBgn0241299
FBgn0033661	FBgn0197157	FBgn0231162
FBgn0261793	FBgn0268332	FBgn0233345
FBgn0033504	FBgn0182494	FBgn0236699
FBgn0026388	FBgn0182483	FBgn0236689
FBgn0029899	FBgn0188401	FBgn0234264
FBgn0259244	FBgn0190614	FBgn0241683
FBgn0000615	FBgn0196568	FBgn0231428
FBgn0266918	FBgn0185075	FBgn0238922
FBgn0033669	FBgn0197153	FBgn0231157
FBgn0023175	FBgn0181821	FBgn0239228
FBgn0033451	FBgn0182453	FBgn0236656
FBgn0053113	FBgn0194066	FBgn0236105
FBgn0037356	FBgn0191293	FBgn0228030
FBgn0260004	FBgn0191485	FBgn0242099
FBgn0035169	FBgn0185289	FBgn0238383
FBgn0027843	FBgn0186049	FBgn0239132
FBgn0028841	FBgn0270294	FBgn0230806
FBgn0030151	FBgn0196100	FBgn0235251
FBgn0038195	FBgn0190453	FBgn0241346
FBgn0087007	FBgn0184347	FBgn0237346
FBgn0002873	FBgn0269643	FBgn0234612
FBgn0027529	FBgn0183250	FBgn0229873
FBgn0085431	FBgn0190341	FBgn0243219
FBgn0285955	FBgn0191895	FBgn0243474
FBgn0001624	FBgn0188596	FBgn0233489
FBgn0051760	FBgn0195195	FBgn0235984
FBgn0264895	FBgn0193889	FBgn0068084
FBgn0032586	FBgn0195416	FBgn0230468
FBgn0035147	FBgn0185273	FBgn0238375
FBgn0020503	FBgn0195463	FBgn0230511
FBgn0259822	FBgn0193594	FBgn0230668
FBgn0052529	FBgn0270786	FBgn0233440
FBgn0263832	FBgn0185505	FBgn0238664
FBgn0035473	FBgn0185031	FBgn0237972
FBgn0033475	FBgn0182473	FBgn0236676
FBgn0053349	FBgn0182208	FBgn0236448
FBgn0029501	FBgn0183601	FBgn0232018
FBgn0040477	FBgn0044191	FBgn0061211
FBgn0031975	FBgn0194876	FBgn0236118
FBgn0053126	FBgn0194304	FBgn0233182
FBgn0032821	FBgn0193155	FBgn0230355
FBgn0032817	FBgn0193159	FBgn0230361
FBgn0265140	FBgn0191878	FBgn0243455
FBgn0267336	FBgn0190177	FBgn0243042
FBgn0015625	FBgn0189789	FBgn0228603
FBgn0029942	FBgn0196083	FBgn0233274
FBgn0030039	FBgn0187754	FBgn0234922
FBgn0053772	FBgn0183803	FBgn0277118
FBgn0263993	FBgn0188408	FBgn0233257
FBgn0085446	FBgn0188391	FBgn0234249
FBgn0262562	FBgn0191693	FBgn0242333
FBgn0010213	FBgn0196806	FBgn0068032
FBgn0051721	FBgn0195093	FBgn0235889
FBgn0259189	FBgn0269566	FBgn0276362
FBgn0033389	FBgn0182408	FBgn0236616
FBgn0264598	FBgn0195939	FBgn0234438
FBgn0030343	FBgn0188624	FBgn0233239
FBgn0052654	FBgn0270225	FBgn0234503
FBgn0029167	FBgn0186141	FBgn0239216
FBgn0033005	FBgn0188269	FBgn0229158
FBgn0263772	FBgn0188257	FBgn0233857
FBgn0266756	FBgn0191871	FBgn0243451
FBgn0039635	FBgn0192849	FBgn0068475
FBgn0265487	FBgn0183008	FBgn0229453
FBgn0026430	FBgn0187241	FBgn0234848
FBgn0264815	FBgn0193565	FBgn0230381
FBgn0036354	FBgn0184396	FBgn0237395
FBgn0034365	FBgn0183147	FBgn0229763
FBgn0033791	FBgn0182701	FBgn0231080
FBgn0033174	FBgn0182252	FBgn0236487
FBgn0003346	FBgn0183774	FBgn0230943
FBgn0032006	FBgn0193831	FBgn0228927
FBgn0032797	FBgn0193173	FBgn0230373
FBgn0038095	FBgn0190377	FBgn0243258
FBgn0017566	FBgn0268936	FBgn0084316
FBgn0266570	FBgn0188273	FBgn0233870
FBgn0023507	FBgn0188190	FBgn0233777
FBgn0030653	FBgn0196016	FBgn0234674
FBgn0035158	FBgn0185225	FBgn0238283
FBgn0261526	FBgn0184970	FBgn0237914
FBgn0030685	FBgn0195833	FBgn0233575
FBgn0259108	FBgn0188163	FBgn0234184
FBgn0004924	FBgn0269042	FBgn0234655
FBgn0264542	FBgn0187577	FBgn0233753
FBgn0264449	FBgn0188068	FBgn0234079
FBgn0266084	FBgn0185817	FBgn0238077
FBgn0005666	FBgn0195752	FBgn0232159
FBgn0027535	FBgn0183178	FBgn0229794
FBgn0029133	FBgn0188679	FBgn0234537
FBgn0000414	FBgn0186334	FBgn0237199
FBgn0262579	FBgn0185744	FBgn0238904
FBgn0262508	FBgn0185798	FBgn0238055
FBgn0041585	FBgn0183074	FBgn0229690
FBgn0259099	FBgn0186190	FBgn0239265
FBgn0260642	FBgn0191011	FBgn0242876
FBgn0039904	FBgn0195742	FBgn0232148
FBgn0261570	FBgn0188922	FBgn0235130
FBgn0028737	FBgn0182977	FBgn0068164
FBgn0035064	FBgn0196233	FBgn0229223
FBgn0033350	FBgn0187049	FBgn0236592
FBgn0033725	FBgn0182636	FBgn0230193
FBgn0020764	FBgn0183554	FBgn0068535
FBgn0283508	FBgn0183026	FBgn0229468
FBgn0051816	FBgn0195417	FBgn0230469
FBgn0032884	FBgn0195629	FBgn0068199
FBgn0036030	FBgn0184627	FBgn0238492
FBgn0039972	FBgn0195703	FBgn0231980
FBgn0267366	FBgn0192791	FBgn0240924
FBgn0037415	FBgn0191338	FBgn0228069
FBgn0039601	FBgn0189561	FBgn0228353
FBgn0087012	FBgn0191229	FBgn0242495
FBgn0039040	FBgn0189938	FBgn0241135
FBgn0020626	FBgn0041668	FBgn0041644
FBgn0027359	FBgn0268205	FBgn0233486
FBgn0086367	FBgn0187713	FBgn0233040
FBgn0023518	FBgn0188025	FBgn0234485
FBgn0053517	FBgn0268702	FBgn0234816
FBgn0030050	FBgn0084862	FBgn0234911
FBgn0020618	FBgn0193867	FBgn0068085
FBgn0031644	FBgn0194693	FBgn0235740
FBgn0035871	FBgn0184724	FBgn0238581
FBgn0011206	FBgn0269171	FBgn0238530
FBgn0053158	FBgn0186321	FBgn0237188
FBgn0036659	FBgn0186338	FBgn0237202
FBgn0035160	FBgn0185220	FBgn0238279
FBgn0036208	FBgn0270739	FBgn0237500
FBgn0039536	FBgn0192781	FBgn0240908
FBgn0260660	FBgn0185684	FBgn0238843
FBgn0014141	FBgn0191728	FBgn0243148
FBgn0261016	FBgn0181839	FBgn0239419
FBgn0267351	FBgn0183172	FBgn0229789
FBgn0259176	FBgn0193521	FBgn0229959
FBgn0029525	FBgn0188091	FBgn0234096
FBgn0259163	FBgn0184621	FBgn0237622
FBgn0036678	FBgn0184168	FBgn0239408
FBgn0263346	FBgn0191235	FBgn0242504
FBgn0032136	FBgn0194997	FBgn0236240
FBgn0260932	FBgn0182583	FBgn0230134
FBgn0283658	FBgn0194852	FBgn0232150
FBgn0027083	FBgn0191908	FBgn0227924
FBgn0032252	FBgn0195083	FBgn0235879
FBgn0259481	FBgn0184528	FBgn0237530
FBgn0061197	FBgn0197130	FBgn0231131
FBgn0043903	FBgn0195787	FBgn0234832
FBgn0004117	FBgn0186829	FBgn0068017
FBgn0086655	FBgn0182181	FBgn0236422
FBgn0041096	FBgn0184479	FBgn0237474
FBgn0085450	FBgn0193857	FBgn0084497
FBgn0261547	FBgn0186361	FBgn0237223
FBgn0263289	FBgn0192728	FBgn0240837
FBgn0052423	FBgn0184928	FBgn0237877
FBgn0000283	FBgn0041670	FBgn0041646
FBgn0032656	FBgn0195475	FBgn0230522
FBgn0043854	FBgn0194791	FBgn0231483
FBgn0085412	FBgn0190438	FBgn0243325
FBgn0031414	FBgn0194537	FBgn0235560
FBgn0035407	FBgn0185068	FBgn0238913
FBgn0033735	FBgn0182649	FBgn0230206
FBgn0283494	FBgn0183564	FBgn0231971
FBgn0033900	FBgn0270365	FBgn0230084
FBgn0033226	FBgn0182282	FBgn0236511
FBgn0086443	FBgn0193195	FBgn0230394
FBgn0031391	FBgn0194266	FBgn0232813
FBgn0261529	FBgn0195322	FBgn0236394
FBgn0032054	FBgn0270241	FBgn0236169
FBgn0039520	FBgn0192774	FBgn0240897
FBgn0037671	FBgn0190124	FBgn0068219
FBgn0038271	FBgn0190492	FBgn0241392
FBgn0037684	FBgn0190131	FBgn0242992
FBgn0037801	FBgn0190201	FBgn0243065
FBgn0037721	FBgn0192242	FBgn0241860
FBgn0020647	FBgn0189859	FBgn0228674
FBgn0260771	FBgn0196095	FBgn0067943
FBgn0029853	FBgn0188377	FBgn0234235
FBgn0031294	FBgn0194327	FBgn0233385
FBgn0040907	FBgn0187926	FBgn0234353
FBgn0032988	FBgn0193038	FBgn0068019
FBgn0039682	FBgn0189239	FBgn0068108
FBgn0037843	FBgn0190240	FBgn0243099
FBgn0025724	FBgn0195265	FBgn0236053
FBgn0010317	FBgn0185468	FBgn0238630
FBgn0025682	FBgn0185315	FBgn0238417
FBgn0027499	FBgn0197235	FBgn0230780
FBgn0083946	FBgn0189763	FBgn0228575
FBgn0002638	FBgn0184888	FBgn0237835
FBgn0026239	FBgn0190771	FBgn0242637
FBgn0013718	FBgn0186165	FBgn0239241
FBgn0031187	FBgn0189092	FBgn0068422
FBgn0010516	FBgn0197168	FBgn0067920
FBgn0036125	FBgn0184554	FBgn0237560
FBgn0036485	FBgn0186210	FBgn0239453
FBgn0034390	FBgn0196656	FBgn0231530
FBgn0037836	FBgn0192166	FBgn0241771
FBgn0035612	FBgn0184913	FBgn0237865
FBgn0261822	FBgn0194882	FBgn0236125
FBgn0040207	FBgn0268788	FBgn0233536
FBgn0262975	FBgn0041665	FBgn0241118
FBgn0261385	FBgn0182265	FBgn0236495
FBgn0036881	FBgn0186483	FBgn0240407
FBgn0261928	FBgn0190198	FBgn0243064
FBgn0001235	FBgn0192184	FBgn0241790
FBgn0005561	FBgn0195757	FBgn0232164
FBgn0035574	FBgn0185559	FBgn0238725
FBgn0262111	FBgn0188901	FBgn0235109
FBgn0003175	FBgn0196436	FBgn0229647
FBgn0003435	FBgn0263228	FBgn0231486
FBgn0266579	FBgn0189611	FBgn0228406
FBgn0001491	FBgn0187640	FBgn0234777
FBgn0013995	FBgn0190890	FBgn0242758
FBgn0259219	FBgn0182721	FBgn0230269
FBgn0030245	FBgn0187654	FBgn0234807
FBgn0259677	FBgn0189106	FBgn0235385
FBgn0263117	FBgn0189998	FBgn0241194
FBgn0003124	FBgn0186544	FBgn0236996
FBgn0035432	FBgn0185454	FBgn0238612
FBgn0026061	FBgn0184191	FBgn0239439
FBgn0052185	FBgn0186388	FBgn0237247
FBgn0085229	FBgn0182156	FBgn0237881
FBgn0033243	FBgn0181979	FBgn0240627
FBgn0263979	FBgn0190504	FBgn0241407
FBgn0034692	FBgn0196459	FBgn0231309
FBgn0034662	FBgn0196476	FBgn0231330
FBgn0033453	FBgn0182454	FBgn0236657
FBgn0034505	FBgn0183252	FBgn0229876
FBgn0033130	FBgn0182219	FBgn0236458
FBgn0260991	FBgn0187007	FBgn0236478
FBgn0033731	FBgn0182646	FBgn0230203
FBgn0004698	FBgn0182863	FBgn0231302
FBgn0013548	FBgn0183527	FBgn0231932
FBgn0034474	FBgn0196603	FBgn0231476
FBgn0033465	FBgn0182465	FBgn0236667
FBgn0050410	FBgn0183492	FBgn0231895
FBgn0051665	FBgn0194507	FBgn0235203
FBgn0011676	FBgn0193632	FBgn0230981
FBgn0011703	FBgn0193680	FBgn0243125
FBgn0003475	FBgn0195600	FBgn0230990
FBgn0032354	FBgn0195141	FBgn0235929
FBgn0032723	FBgn0193219	FBgn0230419
FBgn0261560	FBgn0067508	FBgn0067434
FBgn0085369	FBgn0194634	FBgn0235676
FBgn0031799	FBgn0193990	FBgn0235871
FBgn0032805	FBgn0193168	FBgn0230369
FBgn0260779	FBgn0191617	FBgn0242242
FBgn0037436	FBgn0191357	FBgn0228087
FBgn0038244	FBgn0268990	FBgn0243460
FBgn0038142	FBgn0190414	FBgn0243298
FBgn0039070	FBgn0189918	FBgn0241110
FBgn0038929	FBgn0192377	FBgn0228140
FBgn0037235	FBgn0191209	FBgn0242480
FBgn0045980	FBgn0189799	FBgn0228613
FBgn0030482	FBgn0188695	FBgn0234557
FBgn0032704	FBgn0193234	FBgn0230437
FBgn0030739	FBgn0270166	FBgn0234738
FBgn0031434	FBgn0194215	FBgn0068330
FBgn0263933	FBgn0194413	FBgn0234284
FBgn0066114	FBgn0188262	FBgn0068152
FBgn0030460	FBgn0187550	FBgn0233713
FBgn0029980	FBgn0187773	FBgn0234959
FBgn0029800	FBgn0187863	FBgn0234283
FBgn0032402	FBgn0195181	FBgn0235974
FBgn0031148	FBgn0189057	FBgn0235340
FBgn0030674	FBgn0188793	FBgn0234687
FBgn0027528	FBgn0187387	FBgn0233216
FBgn0030486	FBgn0188697	FBgn0234559
FBgn0035756	FBgn0184799	FBgn0237745
FBgn0020388	FBgn0184437	FBgn0237435
FBgn0036341	FBgn0186110	FBgn0239185
FBgn0263930	FBgn0185823	FBgn0238083
FBgn0000404	FBgn0184498	FBgn0237495
FBgn0041604	FBgn0186177	FBgn0239252
FBgn0027111	FBgn0182766	FBgn0238353
FBgn0003321	FBgn0068586	FBgn0232948
FBgn0045035	FBgn0191844	FBgn0243425
FBgn0004607	FBgn0195744	FBgn0232149
FBgn0032506	FBgn0193483	FBgn0229515
FBgn0266719	FBgn0192615	FBgn0240725
FBgn0030768	FBgn0187398	FBgn0233511
FBgn0051116	FBgn0192099	FBgn0227965
FBgn0260789	FBgn0270881	FBgn0233037
FBgn0016917	FBgn0191541	FBgn0242155
FBgn0024913	FBgn0270443	FBgn0232092
FBgn0262117	FBgn0268904	FBgn0229156
FBgn0016081	FBgn0184628	FBgn0067969
FBgn0260965	FBgn0186092	FBgn0239165
FBgn0037955	FBgn0192095	FBgn0227961
FBgn0039637	FBgn0192851	FBgn0240989
FBgn0028888	FBgn0193384	FBgn0236757
FBgn0051363	FBgn0192119	FBgn0227987
FBgn0033212	FBgn0182003	FBgn0240864
FBgn0085421	FBgn0182074	FBgn0241612
FBgn0259224	FBgn0185472	FBgn0238631
FBgn0029945	FBgn0188426	FBgn0233279
FBgn0005616	FBgn0187546	FBgn0232457
FBgn0010548	FBgn0182027	FBgn0241112
FBgn0051072	FBgn0189659	FBgn0228466
FBgn0261053	FBgn0190234	FBgn0243094
FBgn0035253	FBgn0185166	FBgn0238221
FBgn0003870	FBgn0193021	FBgn0228787
FBgn0261461	FBgn0187267	FBgn0233051
FBgn0265002	FBgn0193715	FBgn0243471
FBgn0259210	FBgn0196272	FBgn0229268
FBgn0052088	FBgn0186010	FBgn0239086
FBgn0023477	FBgn0183550	FBgn0068023
FBgn0262717	FBgn0190221	FBgn0243083
FBgn0033627	FBgn0182557	FBgn0230107
FBgn0003118	FBgn0025031	FBgn0241107
FBgn0030802	FBgn0187376	FBgn0233205
FBgn0040551	FBgn0190402	FBgn0243286
FBgn0001248	FBgn0184720	FBgn0238577
FBgn0263929	FBgn0190482	FBgn0241381
FBgn0003499	FBgn0190705	FBgn0242577
FBgn0004575	FBgn0190194	FBgn0243059
FBgn0053556	FBgn0185687	FBgn0238847
FBgn0052982	FBgn0183767	FBgn0236211
FBgn0036781	FBgn0184083	FBgn0239317
FBgn0025726	FBgn0069472	FBgn0232103
FBgn0031460	FBgn0194197	FBgn0232619
FBgn0003149	FBgn0184689	FBgn0238553
FBgn0036587	FBgn0184228	FBgn0239792
FBgn0036640	FBgn0184190	FBgn0239438
FBgn0028980	FBgn0185621	FBgn0238786
FBgn0266580	FBgn0182157	FBgn0237891
FBgn0033873	FBgn0197022	FBgn0231020
FBgn0050259	FBgn0196420	FBgn0229628
FBgn0014879	FBgn0190509	FBgn0241412
FBgn0023143	FBgn0181832	FBgn0239355
FBgn0033404	FBgn0182417	FBgn0236623
FBgn0005695	FBgn0182365	FBgn0236578
FBgn0033738	FBgn0197119	FBgn0068209
FBgn0259226	FBgn0181931	FBgn0240131
FBgn0033734	FBgn0182648	FBgn0230205
FBgn0050052	FBgn0197098	FBgn0068111
FBgn0013756	FBgn0182582	FBgn0230131
FBgn0029147	FBgn0183387	FBgn0230003
FBgn0011659	FBgn0182319	FBgn0236542
FBgn0051948	FBgn0194230	FBgn0232701
FBgn0021796	FBgn0195232	FBgn0236018
FBgn0031865	FBgn0193938	FBgn0235816
FBgn0051678	FBgn0193113	FBgn0231215
FBgn0010265	FBgn0193818	FBgn0068059
FBgn0032683	FBgn0193250	FBgn0230452
FBgn0028515	FBgn0195402	FBgn0238638
FBgn0041111	FBgn0194583	FBgn0235623
FBgn0032350	FBgn0083442	FBgn0230673
FBgn0003978	FBgn0270297	FBgn0230341
FBgn0043841	FBgn0193533	FBgn0068334
FBgn0032214	FBgn0195051	FBgn0236293
FBgn0032287	FBgn0195100	FBgn0235896
FBgn0284084	FBgn0269885	FBgn0232056
FBgn0037723	FBgn0190155	FBgn0243016
FBgn0002941	FBgn0191457	FBgn0242066
FBgn0266566	FBgn0191791	FBgn0243376
FBgn0028692	FBgn0192856	FBgn0240992
FBgn0037937	FBgn0192107	FBgn0227974
FBgn0265101	FBgn0085141	FBgn0084489
FBgn0038330	FBgn0186771	FBgn0243408
FBgn0014930	FBgn0190950	FBgn0242818
FBgn0038492	FBgn0191722	FBgn0241307
FBgn0039335	FBgn0192668	FBgn0240774
FBgn0038453	FBgn0269626	FBgn0241697
FBgn0038725	FBgn0191584	FBgn0242204
FBgn0002780	FBgn0193036	FBgn0228804
FBgn0037688	FBgn0192263	FBgn0241884
FBgn0024329	FBgn0191633	FBgn0242260
FBgn0038439	FBgn0191757	FBgn0243185
FBgn0038491	FBgn0268513	FBgn0228000
FBgn0263390	FBgn0189944	FBgn0241140
FBgn0038827	FBgn0191516	FBgn0242129
FBgn0053207	FBgn0190542	FBgn0241448
FBgn0261004	FBgn0269748	FBgn0241290
FBgn0261929	FBgn0186815	FBgn0242937
FBgn0086346	FBgn0189607	FBgn0228403
FBgn0039713	FBgn0192909	FBgn0068237
FBgn0030078	FBgn0187726	FBgn0234888
FBgn0259734	FBgn0188502	FBgn0233379
FBgn0052707	FBgn0188507	FBgn0233381
FBgn0030026	FBgn0187759	FBgn0234933
FBgn0259242	FBgn0187821	FBgn0233984
FBgn0030748	FBgn0269054	FBgn0068013
FBgn0039908	FBgn0195720	FBgn0232116
FBgn0030329	FBgn0188615	FBgn0233231
FBgn0028982	FBgn0188378	FBgn0234236
FBgn0030239	FBgn0196104	FBgn0068387
FBgn0031060	FBgn0187234	FBgn0234828
FBgn0039189	FBgn0189829	FBgn0228645
FBgn0039199	FBgn0192553	FBgn0240664
FBgn0030610	FBgn0187480	FBgn0233620
FBgn0027553	FBgn0270760	FBgn0234973
FBgn0263258	FBgn0188905	FBgn0233150
FBgn0030638	FBgn0188774	FBgn0234664
FBgn0031188	FBgn0187153	FBgn0232857
FBgn0003204	FBgn0188563	FBgn0235293
FBgn0027081	FBgn0195188	FBgn0068539
FBgn0031143	FBgn0187182	FBgn0068408
FBgn0032117	FBgn0193763	FBgn0083324
FBgn0267977	FBgn0195834	FBgn0233594
FBgn0014031	FBgn0188388	FBgn0068031
FBgn0029879	FBgn0188395	FBgn0234253
FBgn0030500	FBgn0195855	FBgn0233696
FBgn0263706	FBgn0083440	FBgn0233161
FBgn0030837	FBgn0187343	FBgn0068213
FBgn0000150	FBgn0187960	FBgn0067997
FBgn0013269	FBgn0191835	FBgn0243416
FBgn0032517	FBgn0195266	FBgn0236055
FBgn0039227	FBgn0189803	FBgn0228617
FBgn0038787	FBgn0191553	FBgn0242168
FBgn0000416	FBgn0083425	FBgn0240545
FBgn0028942	FBgn0195277	FBgn0236069
FBgn0032400	FBgn0193548	FBgn0068266
FBgn0250814	FBgn0186327	FBgn0237192
FBgn0035157	FBgn0185226	FBgn0238286
FBgn0052369	FBgn0184755	FBgn0237703
FBgn0032891	FBgn0193096	FBgn0230726
FBgn0053051	FBgn0184139	FBgn0239381
FBgn0010786	FBgn0185323	FBgn0238424
FBgn0061515	FBgn0184363	FBgn0237359
FBgn0054012	FBgn0184548	FBgn0237555
FBgn0036763	FBgn0083441	FBgn0237261
FBgn0036416	FBgn0186169	FBgn0239242
FBgn0035218	FBgn0185190	FBgn0238246
FBgn0004373	FBgn0196999	FBgn0238311
FBgn0028699	FBgn0084321	FBgn0238730
FBgn0264488	FBgn0186032	FBgn0239112
FBgn0002872	FBgn0185136	FBgn0238187
FBgn0085437	FBgn0196024	FBgn0235280
FBgn0085397	FBgn0183372	FBgn0229985
FBgn0030648	FBgn0188776	FBgn0234671
FBgn0035802	FBgn0185724	FBgn0238886
FBgn0266916	FBgn0190074	FBgn0242935
FBgn0035299	FBgn0185131	FBgn0238183
FBgn0026144	FBgn0268718	FBgn0233280
FBgn0284249	FBgn0182186	FBgn0236427
FBgn0033168	FBgn0182034	FBgn0241186
FBgn0010482	FBgn0182079	FBgn0241645
FBgn0036059	FBgn0185911	FBgn0238974
FBgn0032339	FBgn0195133	FBgn0235923
FBgn0032986	FBgn0193037	FBgn0230667
FBgn0262743	FBgn0183779	FBgn0230093
FBgn0027655	FBgn0192815	FBgn0240953
FBgn0052843	FBgn0197051	FBgn0231052
FBgn0029761	FBgn0188316	FBgn0233928
FBgn0259227	FBgn0190292	FBgn0241323
FBgn0053511	FBgn0193083	FBgn0230716
FBgn0039907	FBgn0195722	FBgn0232118
FBgn0037976	FBgn0192079	FBgn0241672
FBgn0035975	FBgn0067517	FBgn0067443
FBgn0004876	FBgn0191615	FBgn0242240
FBgn0015524	FBgn0196557	FBgn0231416
FBgn0264272	FBgn0185302	FBgn0238405
FBgn0264087	FBgn0193885	FBgn0235767
FBgn0003174	FBgn0182240	FBgn0236479
FBgn0033741	FBgn0182654	FBgn0230210
FBgn0031589	FBgn0183730	FBgn0232357
FBgn0039928	FBgn0195705	FBgn0232091
FBgn0003513	FBgn0191767	FBgn0243346
FBgn0036480	FBgn0186208	FBgn0239284
FBgn0037939	FBgn0069516	FBgn0241327
FBgn0263143	FBgn0189952	FBgn0241150
FBgn0026573	FBgn0182591	FBgn0230139
FBgn0085488	FBgn0270463	FBgn0275724
FBgn0263109	FBgn0187002	FBgn0237942
FBgn0265416	FBgn0188699	FBgn0234560
FBgn0001253	FBgn0189179	FBgn0238039
FBgn0010905	FBgn0185100	FBgn0238950
FBgn0036391	FBgn0184368	FBgn0237365
FBgn0053170	FBgn0186728	FBgn0239858
FBgn0036369	FBgn0184382	FBgn0237383
FBgn0000659	FBgn0189572	FBgn0228365
FBgn0266019	FBgn0269581	FBgn0233238
FBgn0020496	FBgn0190385	FBgn0243266
FBgn0028479	FBgn0193758	FBgn0228340
FBgn0035217	FBgn0192072	FBgn0238429
FBgn0038693	FBgn0191602	FBgn0242228
FBgn0266282	FBgn0189844	FBgn0228658
FBgn0264894	FBgn0195253	FBgn0236042
FBgn0033921	FBgn0196973	FBgn0230072
FBgn0039232	FBgn0192587	FBgn0240699
FBgn0004811	FBgn0193154	FBgn0230354
FBgn0045852	FBgn0193229	FBgn0230429
FBgn0038292	FBgn0190498	FBgn0241401
FBgn0039647	FBgn0189485	FBgn0228330
FBgn0259241	FBgn0187650	FBgn0234800
FBgn0039424	FBgn0189680	FBgn0228485
FBgn0259143	FBgn0188651	FBgn0234497
FBgn0031626	FBgn0194090	FBgn0232279
FBgn0031737	FBgn0194030	FBgn0236348
FBgn0041164	FBgn0185467	FBgn0238629
FBgn0035733	FBgn0184816	FBgn0237764
FBgn0030218	FBgn0187666	FBgn0232963
FBgn0263241	FBgn0185965	FBgn0239028
FBgn0259228	FBgn0187808	FBgn0068524
FBgn0003345	FBgn0196142	FBgn0234705
FBgn0025693	FBgn0182121	FBgn0236784
FBgn0033834	FBgn0268211	FBgn0231045
FBgn0001316	FBgn0196988	FBgn0238300
FBgn0053143	FBgn0183421	FBgn0231632
FBgn0010113	FBgn0192939	FBgn0228706
FBgn0261549	FBgn0188500	FBgn0233377
FBgn0266582	FBgn0185069	FBgn0238914
FBgn0001259	FBgn0186552	FBgn0237007
FBgn0263831	FBgn0184929	FBgn0237878
FBgn0036741	FBgn0186395	FBgn0237251
FBgn0011692	FBgn0082400	FBgn0250859
FBgn0026404	FBgn0185914	FBgn0238977
FBgn0261445	FBgn0184825	FBgn0237773
FBgn0034389	FBgn0183159	FBgn0229776
FBgn0033828	FBgn0197048	FBgn0231048
FBgn0050456	FBgn0183000	FBgn0229444
FBgn0033438	FBgn0181833	FBgn0239366
FBgn0026441	FBgn0186830	FBgn0241418
FBgn0035094	FBgn0196208	FBgn0229193
FBgn0025578	FBgn0268987	FBgn0229224
FBgn0278604	FBgn0190161	FBgn0243023
FBgn0260959	FBgn0197155	FBgn0231159
FBgn0003612	FBgn0182399	FBgn0236608
FBgn0034945	FBgn0196301	FBgn0229307
FBgn0034638	FBgn0196498	FBgn0231352
FBgn0033494	FBgn0197279	FBgn0238999
FBgn0034545	FBgn0183276	FBgn0229903
FBgn0033137	FBgn0182051	FBgn0241386
FBgn0025373	FBgn0197193	FBgn0230730
FBgn0033571	FBgn0186925	FBgn0230766
FBgn0033309	FBgn0181929	FBgn0240093
FBgn0034458	FBgn0196613	FBgn0231487
FBgn0264089	FBgn0196876	FBgn0231745
FBgn0034068	FBgn0196859	FBgn0231728
FBgn0010194	FBgn0084925	FBgn0084434
FBgn0041247	FBgn0193895	FBgn0235777
FBgn0021906	FBgn0194295	FBgn0068089
FBgn0031347	FBgn0194298	FBgn0233117
FBgn0027453	FBgn0193626	FBgn0230922
FBgn0003231	FBgn0013883	FBgn0022822
FBgn0001965	FBgn0063991	FBgn0236085
FBgn0001137	FBgn0193807	FBgn0228812
FBgn0031540	FBgn0194149	FBgn0232455
FBgn0031313	FBgn0194317	FBgn0233300
FBgn0031309	FBgn0194319	FBgn0233320
FBgn0000287	FBgn0195148	FBgn0235935
FBgn0028880	FBgn0195372	FBgn0238325
FBgn0011230	FBgn0193847	FBgn0229027
FBgn0031492	FBgn0183745	FBgn0235633
FBgn0260439	FBgn0194908	FBgn0068095
FBgn0031397	FBgn0194260	FBgn0232793
FBgn0003961	FBgn0194866	FBgn0232210
FBgn0021944	FBgn0194824	FBgn0231871
FBgn0262160	FBgn0193503	FBgn0229730
FBgn0051663	FBgn0194281	FBgn0232916
FBgn0039165	FBgn0192531	FBgn0240642
FBgn0026257	FBgn0250857	FBgn0022414
FBgn0039627	FBgn0192842	FBgn0240980
FBgn0037351	FBgn0191289	FBgn0068418
FBgn0037413	FBgn0191336	FBgn0228066
FBgn0020407	FBgn0190591	FBgn0241503
FBgn0038516	FBgn0190671	FBgn0242544
FBgn0039588	FBgn0189575	FBgn0228368
FBgn0037661	FBgn0190117	FBgn0242978
FBgn0037918	FBgn0192120	FBgn0227988
FBgn0259146	FBgn0268499	FBgn0240812
FBgn0037251	FBgn0191168	FBgn0242427
FBgn0037755	FBgn0192225	FBgn0241832
FBgn0002868	FBgn0012845	FBgn0263438
FBgn0051005	FBgn0188104	FBgn0240519
FBgn0037329	FBgn0191276	FBgn0242537
FBgn0038755	FBgn0041661	FBgn0242185
FBgn0037213	FBgn0269468	FBgn0242470
FBgn0037322	FBgn0270430	FBgn0242366
FBgn0038300	FBgn0190501	FBgn0241404
FBgn0037838	FBgn0190232	FBgn0243093
FBgn0038603	FBgn0191659	FBgn0242294
FBgn0262871	FBgn0190656	FBgn0228006
FBgn0041186	FBgn0186746	FBgn0228331
FBgn0037606	FBgn0190080	FBgn0242941
FBgn0015781	FBgn0190772	FBgn0242641
FBgn0017545	FBgn0269783	FBgn0068049
FBgn0030187	FBgn0195978	FBgn0275698
FBgn0030528	FBgn0188717	FBgn0234592
FBgn0030966	FBgn0187276	FBgn0233062
FBgn0030680	FBgn0187440	FBgn0233576
FBgn0039936	FBgn0195712	FBgn0232104
FBgn0035577	FBgn0184949	FBgn0237892
FBgn0031059	FBgn0195785	FBgn0234829
FBgn0031091	FBgn0268580	FBgn0234811
FBgn0031428	FBgn0194545	FBgn0235588
FBgn0011818	FBgn0194548	FBgn0235592
FBgn0025678	FBgn0193329	FBgn0230537
FBgn0052647	FBgn0187566	FBgn0277205
FBgn0259994	FBgn0187878	FBgn0234297
FBgn0030007	FBgn0187762	FBgn0234942
FBgn0026086	FBgn0270842	FBgn0234204
FBgn0265767	FBgn0187134	FBgn0235387
FBgn0266569	FBgn0195549	FBgn0234157
FBgn0004643	FBgn0196054	FBgn0233802
FBgn0030662	FBgn0187452	FBgn0233587
FBgn0001612	FBgn0187529	FBgn0233687
FBgn0002917	FBgn0188736	FBgn0234616
FBgn0030780	FBgn0188857	FBgn0235067
FBgn0031955	FBgn0193865	FBgn0235753
FBgn0032491	FBgn0195245	FBgn0236034
FBgn0260744	FBgn0192085	FBgn0241677
FBgn0260049	FBgn0186130	FBgn0239202
FBgn0052448	FBgn0183822	FBgn0236862
FBgn0052380	FBgn0184783	FBgn0237732
FBgn0041156	FBgn0185738	FBgn0238897
FBgn0004401	FBgn0184123	FBgn0239362
FBgn0028379	FBgn0185745	FBgn0067976
FBgn0041004	FBgn0270085	FBgn0239885
FBgn0016694	FBgn0184754	FBgn0237702
FBgn0035445	FBgn0185463	FBgn0238626
FBgn0035382	FBgn0185421	FBgn0237662
FBgn0035186	FBgn0185301	FBgn0238398
FBgn0036147	FBgn0184540	FBgn0237549
FBgn0036141	FBgn0184542	FBgn0237550
FBgn0004390	FBgn0184612	FBgn0237615
FBgn0035102	FBgn0185249	FBgn0238327
FBgn0036014	FBgn0185880	FBgn0238144
FBgn0003459	FBgn0189124	FBgn0237347
FBgn0261553	FBgn0185982	FBgn0239047
FBgn0025641	FBgn0269205	FBgn0234050
FBgn0039831	FBgn0192990	FBgn0068473
FBgn0264443	FBgn0193145	FBgn0230344
FBgn0243516	FBgn0196456	FBgn0231306
FBgn0001404	FBgn0270309	FBgn0233801
FBgn0037842	FBgn0192164	FBgn0241769
FBgn0030613	FBgn0196137	FBgn0234646
FBgn0020912	FBgn0192978	FBgn0228743
FBgn0261552	FBgn0190138	FBgn0242999
FBgn0260749	FBgn0193690	FBgn0243251
FBgn0037533	FBgn0190943	FBgn0242812
FBgn0020379	FBgn0268123	FBgn0241794
FBgn0030600	FBgn0187483	FBgn0233624
FBgn0028496	FBgn0196685	FBgn0231551
FBgn0034962	FBgn0183561	FBgn0231974
FBgn0003016	FBgn0193409	FBgn0241972
FBgn0284250	FBgn0182816	FBgn0231253
FBgn0013765	FBgn0197042	FBgn0231042
FBgn0261641	FBgn0191044	FBgn0241242
FBgn0005427	FBgn0188099	FBgn0234103
FBgn0033017	FBgn0182135	FBgn0068508
FBgn0031023	FBgn0250777	FBgn0233410
FBgn0003559	FBgn0269369	FBgn0232830
FBgn0085451	FBgn0196178	FBgn0235200
FBgn0034420	FBgn0183181	FBgn0229798
FBgn0262732	FBgn0186325	FBgn0067948
FBgn0261671	FBgn0195451	FBgn0230500
FBgn0020278	FBgn0186758	FBgn0241162
FBgn0261555	FBgn0185879	FBgn0238141
FBgn0265356	FBgn0183175	FBgn0229791
FBgn0033194	FBgn0182263	FBgn0236494
FBgn0005677	FBgn0193327	FBgn0230534
FBgn0038466	FBgn0190634	FBgn0241710
FBgn0029838	FBgn0187844	FBgn0068308
FBgn0033029	FBgn0182126	FBgn0236788
FBgn0267376	FBgn0192161	FBgn0241766
FBgn0260487	FBgn0186860	FBgn0240891
FBgn0004587	FBgn0190428	FBgn0243315
FBgn0002643	FBgn0182761	FBgn0230311
FBgn0034797	FBgn0183464	FBgn0231867
FBgn0004795	FBgn0183519	FBgn0231925
FBgn0033028	FBgn0182127	FBgn0068479
FBgn0040089	FBgn0268154	FBgn0234826
FBgn0035976	FBgn0185853	FBgn0238110
FBgn0035934	FBgn0184682	FBgn0238544
FBgn0085436	FBgn0181845	FBgn0239473
FBgn0263846	FBgn0194641	FBgn0235684
FBgn0004913	FBgn0191242	FBgn0242509
FBgn0023213	FBgn0268998	FBgn0232101
FBgn0025836	FBgn0067513	FBgn0043604
FBgn0051064	FBgn0189628	FBgn0228434
FBgn0053180	FBgn0270271	FBgn0233559
FBgn0085442	FBgn0183646	FBgn0232058
FBgn0040068	FBgn0188994	FBgn0233403
FBgn0039697	FBgn0189209	FBgn0068236
FBgn0085426	FBgn0183322	FBgn0229949
FBgn0083940	FBgn0196021	FBgn0235271
FBgn0259986	FBgn0185008	FBgn0237949
FBgn0259188	FBgn0269349	FBgn0234965
FBgn0031857	FBgn0193943	FBgn0235822
FBgn0035106	FBgn0185246	FBgn0238322
FBgn0004889	FBgn0192198	FBgn0241807
FBgn0011705	FBgn0193775	FBgn0228503
FBgn0052137	FBgn0186146	FBgn0239220
FBgn0267330	FBgn0195077	FBgn0236314
FBgn0015278	FBgn0184503	FBgn0237502
FBgn0062440	FBgn0196709	FBgn0231576
FBgn0026666	FBgn0188795	FBgn0234690
FBgn0036324	FBgn0184417	FBgn0237413
FBgn0037239	FBgn0191211	FBgn0242482
FBgn0052694	FBgn0196028	FBgn0235262
FBgn0038826	FBgn0190876	FBgn0242747
FBgn0028704	FBgn0193748	FBgn0228246
FBgn0250753	FBgn0191094	FBgn0067980
FBgn0051660	FBgn0194691	FBgn0235738
FBgn0003339	FBgn0191014	FBgn0242877
FBgn0260799	FBgn0268945	FBgn0276910
FBgn0038676	FBgn0190774	FBgn0242643
FBgn0031762	FBgn0194012	FBgn0236330
FBgn0038181	FBgn0186825	FBgn0243329
FBgn0263112	FBgn0195721	FBgn0232167
FBgn0037698	FBgn0192257	FBgn0241877
FBgn0052113	FBgn0186085	FBgn0239160
FBgn0085390	FBgn0181990	FBgn0240739
FBgn0034918	FBgn0268649	FBgn0277004
FBgn0038326	FBgn0190526	FBgn0241427
FBgn0026374	FBgn0188809	FBgn0234702
FBgn0038203	FBgn0190457	FBgn0241349
FBgn0028697	FBgn0183680	FBgn0068079
FBgn0028509	FBgn0195301	FBgn0236091
FBgn0263256	FBgn0194887	FBgn0236129
FBgn0260461	FBgn0186484	FBgn0240408
FBgn0042094	FBgn0192156	FBgn0241761
FBgn0035931	FBgn0184683	FBgn0238547
FBgn0035402	FBgn0185070	FBgn0238916
FBgn0035379	FBgn0185083	FBgn0238931
FBgn0035372	FBgn0185087	FBgn0238938
FBgn0035468	FBgn0189152	FBgn0237976
FBgn0026259	FBgn0185046	FBgn0237990
FBgn0035873	FBgn0185770	FBgn0238031
FBgn0035638	FBgn0189146	FBgn0237847
FBgn0004556	FBgn0184176	FBgn0239418
FBgn0261274	FBgn0270125	FBgn0238678
FBgn0035515	FBgn0185523	FBgn0238687
FBgn0045073	FBgn0187432	FBgn0233558
FBgn0261090	FBgn0184315	FBgn0237319
FBgn0036804	FBgn0184065	FBgn0239293
FBgn0003997	FBgn0184082	FBgn0239316
FBgn0043806	FBgn0185841	FBgn0238099
FBgn0035724	FBgn0184824	FBgn0237772
FBgn0053263	FBgn0184391	FBgn0237390
FBgn0033258	FBgn0181967	FBgn0240527
FBgn0030686	FBgn0188799	FBgn0234695
FBgn0034075	FBgn0182914	FBgn0229546
FBgn0038312	FBgn0190511	FBgn0068314
FBgn0034183	FBgn0182994	FBgn0229438
FBgn0259678	FBgn0181830	FBgn0239335
FBgn0037340	FBgn0191098	FBgn0241295
FBgn0050499	FBgn0182014	FBgn0240982
FBgn0034484	FBgn0183241	FBgn0229861
FBgn0033663	FBgn0083436	FBgn0231161
FBgn0034853	FBgn0183496	FBgn0231899
FBgn0011660	FBgn0196905	FBgn0231779
FBgn0034722	FBgn0183402	FBgn0231799
FBgn0085425	FBgn0183302	FBgn0229932
FBgn0021872	FBgn0183308	FBgn0229936
FBgn0050502	FBgn0182032	FBgn0241156
FBgn0005624	FBgn0197077	FBgn0231082
FBgn0010415	FBgn0196510	FBgn0231367
FBgn0028426	FBgn0197273	FBgn0238915
FBgn0033357	FBgn0182386	FBgn0236596
FBgn0033138	FBgn0182049	FBgn0241364
FBgn0034435	FBgn0183195	FBgn0229813
FBgn0033287	FBgn0268346	FBgn0068212
FBgn0027585	FBgn0182366	FBgn0236580
FBgn0034913	FBgn0196320	FBgn0229327
FBgn0003396	FBgn0182535	FBgn0230576
FBgn0000581	FBgn0182564	FBgn0230113
FBgn0034443	FBgn0196622	FBgn0231495
FBgn0033136	FBgn0182225	FBgn0236464
FBgn0033369	FBgn0181884	FBgn0239836
FBgn0261611	FBgn0182614	FBgn0230170
FBgn0266111	FBgn0182624	FBgn0230181
FBgn0034920	FBgn0183544	FBgn0231949
FBgn0034583	FBgn0196539	FBgn0068505
FBgn0261596	FBgn0196430	FBgn0068324
FBgn0260866	FBgn0196435	FBgn0229646
FBgn0034477	FBgn0196602	FBgn0231474
FBgn0034296	FBgn0196714	FBgn0231580
FBgn0034655	FBgn0183358	FBgn0229974
FBgn0265182	FBgn0183645	FBgn0232057
FBgn0050419	FBgn0196280	FBgn0229278
FBgn0085408	FBgn0182798	FBgn0231237
FBgn0027619	FBgn0182469	FBgn0236670
FBgn0085428	FBgn0182939	FBgn0229574
FBgn0034135	FBgn0182957	FBgn0229594
FBgn0037633	FBgn0192299	FBgn0241918
FBgn0033264	FBgn0182314	FBgn0236538
FBgn0000633	FBgn0182740	FBgn0230290
FBgn0033891	FBgn0182757	FBgn0230307
FBgn0022382	FBgn0181808	FBgn0239117
FBgn0051935	FBgn0194297	FBgn0233106
FBgn0032781	FBgn0195555	FBgn0230941
FBgn0032804	FBgn0195571	FBgn0230955
FBgn0028532	FBgn0195300	FBgn0068233
FBgn0261514	FBgn0195306	FBgn0236381
FBgn0261239	FBgn0195659	FBgn0230623
FBgn0001978	FBgn0195356	FBgn0238180
FBgn0022893	FBgn0193058	FBgn0265273
FBgn0032814	FBgn0195578	FBgn0230962
FBgn0015623	FBgn0194788	FBgn0231454
FBgn0031940	FBgn0193874	FBgn0235761
FBgn0267972	FBgn0194510	FBgn0235243
FBgn0031379	FBgn0194513	FBgn0235264
FBgn0031381	FBgn0194514	FBgn0235296
FBgn0026396	FBgn0194520	FBgn0235358
FBgn0031392	FBgn0194524	FBgn0235388
FBgn0031997	FBgn0194890	FBgn0236134
FBgn0015772	FBgn0193215	FBgn0230415
FBgn0031562	FBgn0194130	FBgn0232403
FBgn0263852	FBgn0193814	FBgn0228855
FBgn0010309	FBgn0195541	FBgn0230928
FBgn0032692	FBgn0193245	FBgn0230447
FBgn0028902	FBgn0195382	FBgn0238442
FBgn0031484	FBgn0194586	FBgn0235627
FBgn0004867	FBgn0193737	FBgn0067925
FBgn0051706	FBgn0193576	FBgn0230517
FBgn0032873	FBgn0195621	FBgn0231003
FBgn0014000	FBgn0083428	FBgn0068106
FBgn0032818	FBgn0193158	FBgn0230359
FBgn0262647	FBgn0195136	FBgn0235926
FBgn0000320	FBgn0193969	FBgn0235850
FBgn0032169	FBgn0195020	FBgn0236263
FBgn0005593	FBgn0195039	FBgn0068066
FBgn0032229	FBgn0195060	FBgn0236301
FBgn0010398	FBgn0195089	FBgn0235884
FBgn0024230	FBgn0193180	FBgn0068143
FBgn0037305	FBgn0191125	FBgn0242381
FBgn0039559	FBgn0189591	FBgn0228385
FBgn0011768	FBgn0192160	FBgn0241765
FBgn0086355	FBgn0025034	FBgn0025012
FBgn0039229	FBgn0192585	FBgn0240697
FBgn0002622	FBgn0192469	FBgn0068050
FBgn0011289	FBgn0192769	FBgn0240884
FBgn0039250	FBgn0192599	FBgn0240709
FBgn0039252	FBgn0192601	FBgn0240711
FBgn0015240	FBgn0192609	FBgn0240719
FBgn0037405	FBgn0191329	FBgn0228059
FBgn0037417	FBgn0191340	FBgn0228071
FBgn0037430	FBgn0191352	FBgn0068412
FBgn0039411	FBgn0189686	FBgn0228491
FBgn0038423	FBgn0191768	FBgn0243347
FBgn0037719	FBgn0192243	FBgn0241861
FBgn0037667	FBgn0190122	FBgn0242985
FBgn0025802	FBgn0192100	FBgn0227966
FBgn0037578	FBgn0192334	FBgn0241951
FBgn0037574	FBgn0186791	FBgn0241955
FBgn0037563	FBgn0192340	FBgn0241961
FBgn0266409	FBgn0192435	FBgn0228197
FBgn0022943	FBgn0190709	FBgn0242580
FBgn0039385	FBgn0192692	FBgn0240800
FBgn0037894	FBgn0190272	FBgn0243133
FBgn0037544	FBgn0190933	FBgn0242803
FBgn0038925	FBgn0190005	FBgn0241202
FBgn0019960	FBgn0190007	FBgn0241204
FBgn0039234	FBgn0192590	FBgn0240701
FBgn0038447	FBgn0190619	FBgn0241689
FBgn0051109	FBgn0189776	FBgn0228590
FBgn0037758	FBgn0270477	FBgn0241831
FBgn0261859	FBgn0191857	FBgn0243438
FBgn0039836	FBgn0188094	FBgn0240517
FBgn0038771	FBgn0191562	FBgn0242176
FBgn0038746	FBgn0186761	FBgn0242192
FBgn0053977	FBgn0268077	FBgn0241558
FBgn0038149	FBgn0191971	FBgn0068188
FBgn0038115	FBgn0191992	FBgn0241585
FBgn0038903	FBgn0190028	FBgn0241228
FBgn0037809	FBgn0190206	FBgn0243070
FBgn0038163	FBgn0190426	FBgn0243313
FBgn0038167	FBgn0190430	FBgn0243318
FBgn0014006	FBgn0190822	FBgn0242694
FBgn0039350	FBgn0192678	FBgn0240785
FBgn0037327	FBgn0191109	FBgn0242361
FBgn0037679	FBgn0192267	FBgn0241887
FBgn0004053	FBgn0191017	FBgn0242880
FBgn0024912	FBgn0191029	FBgn0242890
FBgn0010812	FBgn0191449	FBgn0242058
FBgn0037772	FBgn0190179	FBgn0243044
FBgn0053098	FBgn0190340	FBgn0243220
FBgn0038057	FBgn0190355	FBgn0243235
FBgn0004644	FBgn0189928	FBgn0241122
FBgn0041229	FBgn0192358	FBgn0228116
FBgn0067317	FBgn0192360	FBgn0228119
FBgn0051465	FBgn0192366	FBgn0228124
FBgn0038490	FBgn0186835	FBgn0227999
FBgn0028992	FBgn0190657	FBgn0067931
FBgn0037612	FBgn0190086	FBgn0242945
FBgn0037626	FBgn0190095	FBgn0242955
FBgn0037634	FBgn0190100	FBgn0242960
FBgn0037232	FBgn0191206	FBgn0242478
FBgn0028833	FBgn0189691	FBgn0228498
FBgn0053193	FBgn0189934	FBgn0241130
FBgn0039039	FBgn0189939	FBgn0241136
FBgn0039016	FBgn0084784	FBgn0241151
FBgn0261108	FBgn0190063	FBgn0242925
FBgn0010282	FBgn0191360	FBgn0228092
FBgn0037926	FBgn0190946	FBgn0241320
FBgn0003267	FBgn0189655	FBgn0228462
FBgn0038510	FBgn0191709	FBgn0242352
FBgn0039112	FBgn0189884	FBgn0068517
FBgn0038400	FBgn0191782	FBgn0243364
FBgn0052016	FBgn0195711	FBgn0232100
FBgn0285954	FBgn0188834	FBgn0275623
FBgn0030529	FBgn0187524	FBgn0233682
FBgn0086450	FBgn0187715	FBgn0234873
FBgn0030081	FBgn0187724	FBgn0234886
FBgn0001083	FBgn0187597	FBgn0234225
FBgn0262636	FBgn0195724	FBgn0232119
FBgn0263997	FBgn0196025	FBgn0235282
FBgn0030480	FBgn0188691	FBgn0234555
FBgn0031107	FBgn0189041	FBgn0235315
FBgn0001206	FBgn0066164	FBgn0232964
FBgn0028746	FBgn0187965	FBgn0234396
FBgn0000611	FBgn0188823	FBgn0234722
FBgn0003274	FBgn0182961	FBgn0068062
FBgn0031021	FBgn0188998	FBgn0068470
FBgn0000618	FBgn0195867	FBgn0234764
FBgn0052667	FBgn0187644	FBgn0234790
FBgn0024733	FBgn0183785	FBgn0067935
FBgn0086378	FBgn0184578	FBgn0277270
FBgn0040056	FBgn0268659	FBgn0236811
FBgn0260987	FBgn0194210	FBgn0237084
FBgn0031435	FBgn0194550	FBgn0235594
FBgn0003444	FBgn0194405	FBgn0234200
FBgn0039183	FBgn0192544	FBgn0240652
FBgn0014366	FBgn0191095	FBgn0241292
FBgn0266572	FBgn0269659	FBgn0267343
FBgn0040370	FBgn0188098	FBgn0234102
FBgn0031191	FBgn0189095	FBgn0235375
FBgn0029770	FBgn0188323	FBgn0233936
FBgn0029714	FBgn0188285	FBgn0233882
FBgn0030864	FBgn0188902	FBgn0233147
FBgn0052762	FBgn0187885	FBgn0234303
FBgn0283741	FBgn0188176	FBgn0234208
FBgn0029820	FBgn0188350	FBgn0235015
FBgn0030013	FBgn0196088	FBgn0233333
FBgn0029897	FBgn0268277	FBgn0068331
FBgn0030326	FBgn0187627	FBgn0235061
FBgn0004654	FBgn0012849	FBgn0020945
FBgn0283545	FBgn0268618	FBgn0233815
FBgn0030293	FBgn0188592	FBgn0233483
FBgn0265001	FBgn0193745	FBgn0228214
FBgn0030394	FBgn0188652	FBgn0234499
FBgn0032105	FBgn0193768	FBgn0228432
FBgn0040337	FBgn0188144	FBgn0234153
FBgn0028421	FBgn0187639	FBgn0234776
FBgn0032139	FBgn0195001	FBgn0236245
FBgn0031952	FBgn0193868	FBgn0235755
FBgn0051019	FBgn0192960	FBgn0228724
FBgn0028527	FBgn0195281	FBgn0236073
FBgn0039861	FBgn0193017	FBgn0228784
FBgn0038651	FBgn0191631	FBgn0242259
FBgn0000140	FBgn0192578	FBgn0240690
FBgn0032521	FBgn0195267	FBgn0236056
FBgn0039876	FBgn0187899	FBgn0240494
FBgn0039790	FBgn0186745	FBgn0240566
FBgn0039679	FBgn0192882	FBgn0241015
FBgn0031536	FBgn0194152	FBgn0232465
FBgn0020251	FBgn0185657	FBgn0238822
FBgn0002901	FBgn0186419	FBgn0237272
FBgn0052069	FBgn0184559	FBgn0237565
FBgn0035766	FBgn0184793	FBgn0237739
FBgn0036652	FBgn0186332	FBgn0237197
FBgn0021768	FBgn0186344	FBgn0237206
FBgn0036671	FBgn0186352	FBgn0237214
FBgn0036242	FBgn0186037	FBgn0239119
FBgn0036340	FBgn0186108	FBgn0239184
FBgn0260862	FBgn0185227	FBgn0238287
FBgn0041147	FBgn0185487	FBgn0067964
FBgn0266369	FBgn0193090	FBgn0068197
FBgn0036627	FBgn0186319	FBgn0240213
FBgn0035488	FBgn0185019	FBgn0237960
FBgn0052085	FBgn0184513	FBgn0237512
FBgn0036454	FBgn0186187	FBgn0239263
FBgn0036038	FBgn0185898	FBgn0238162
FBgn0036046	FBgn0185904	FBgn0238966
FBgn0035541	FBgn0184980	FBgn0237925
FBgn0036262	FBgn0186050	FBgn0068263
FBgn0011573	FBgn0025042	FBgn0238462
FBgn0067864	FBgn0185357	FBgn0238465
FBgn0035101	FBgn0185258	FBgn0238337
FBgn0035137	FBgn0182775	FBgn0238365
FBgn0027594	FBgn0185159	FBgn0238213
FBgn0036271	FBgn0184461	FBgn0237455
FBgn0260941	FBgn0184463	FBgn0237459
FBgn0035526	FBgn0185529	FBgn0068447
FBgn0052251	FBgn0185534	FBgn0238697
FBgn0036428	FBgn0184344	FBgn0237343
FBgn0036770	FBgn0184093	FBgn0239331
FBgn0052082	FBgn0185974	FBgn0239039
FBgn0036219	FBgn0186022	FBgn0239103
FBgn0262719	FBgn0184709	FBgn0238570
FBgn0003655	FBgn0187823	FBgn0233988
FBgn0263397	FBgn0182797	FBgn0231235
FBgn0030684	FBgn0270182	FBgn0234694
FBgn0045759	FBgn0185679	FBgn0238841
FBgn0003862	FBgn0191905	FBgn0243480
FBgn0030276	FBgn0270319	FBgn0233475
FBgn0050263	FBgn0183355	FBgn0229973
FBgn0004919	FBgn0196213	FBgn0229198
FBgn0038197	FBgn0190454	FBgn0241347
FBgn0265003	FBgn0182197	FBgn0236438
FBgn0260748	FBgn0188889	FBgn0235095
FBgn0002440	FBgn0184876	FBgn0237824
FBgn0023097	FBgn0190863	FBgn0242735
FBgn0040752	FBgn0197004	FBgn0230089
FBgn0015615	FBgn0187402	FBgn0233515
FBgn0036032	FBgn0185894	FBgn0238157
FBgn0052181	FBgn0186402	FBgn0237258
FBgn0035238	FBgn0189162	FBgn0238234
FBgn0029687	FBgn0188256	FBgn0233854
FBgn0003464	FBgn0189079	FBgn0235357
FBgn0029864	FBgn0188382	FBgn0234240
FBgn0261631	FBgn0269081	FBgn0277000
FBgn0037885	FBgn0192138	FBgn0243123
FBgn0261573	FBgn0189000	FBgn0233411
FBgn0260643	FBgn0268490	FBgn0237585
FBgn0264491	FBgn0192376	FBgn0228139
FBgn0264495	FBgn0191362	FBgn0228094
FBgn0031292	FBgn0269590	FBgn0233407
FBgn0032336	FBgn0193607	FBgn0230759
FBgn0052666	FBgn0268253	FBgn0233500
FBgn0259192	FBgn0194272	FBgn0232837
FBgn0039044	FBgn0189936	FBgn0241132
FBgn0052000	FBgn0195738	FBgn0232136
FBgn0052112	FBgn0186082	FBgn0239157
FBgn0039677	FBgn0192880	FBgn0241014
FBgn0031770	FBgn0268553	FBgn0242916
FBgn0033354	FBgn0181899	FBgn0239903
FBgn0042185	FBgn0185658	FBgn0238824
FBgn0003984	FBgn0184895	FBgn0237844
FBgn0038811	FBgn0191531	FBgn0242144
FBgn0036157	FBgn0185989	FBgn0239054
FBgn0037831	FBgn0190226	FBgn0243088
FBgn0036191	FBgn0186006	FBgn0239081
FBgn0039209	FBgn0189818	FBgn0228631
FBgn0000542	FBgn0068632	FBgn0233848
FBgn0052626	FBgn0268070	FBgn0233680
FBgn0011722	FBgn0193980	FBgn0235862
FBgn0038418	FBgn0190599	FBgn0241511
FBgn0036958	FBgn0183942	FBgn0239647
FBgn0250908	FBgn0189667	FBgn0228473
FBgn0030376	FBgn0188638	FBgn0234013
FBgn0051216	FBgn0190811	FBgn0242683
FBgn0039710	FBgn0189178	FBgn0228284
FBgn0003969	FBgn0195831	FBgn0233551
FBgn0005636	FBgn0183588	FBgn0232002
FBgn0084001	FBgn0268466	FBgn0276419
FBgn0038291	FBgn0190497	FBgn0241400
FBgn0265935	FBgn0182068	FBgn0241528
FBgn0035799	FBgn0185723	FBgn0238884
FBgn0032752	FBgn0193204	FBgn0068499
FBgn0051004	FBgn0188172	FBgn0240524
FBgn0086908	FBgn0196235	FBgn0229227
FBgn0039897	FBgn0195740	FBgn0232142
FBgn0267978	FBgn0182124	FBgn0236786
FBgn0030976	FBgn0188973	FBgn0235209
FBgn0082582	FBgn0192957	FBgn0228722
FBgn0011642	FBgn0195706	FBgn0232093
FBgn0038975	FBgn0192413	FBgn0228176
FBgn0033808	FBgn0182713	FBgn0230261
FBgn0040319	FBgn0187765	FBgn0234947
FBgn0025864	FBgn0068668	FBgn0233360
FBgn0038735	FBgn0190818	FBgn0242690
FBgn0000636	FBgn0195494	FBgn0230883
FBgn0285925	FBgn0190624	FBgn0241695
FBgn0036348	FBgn0186124	FBgn0239196
FBgn0038909	FBgn0190019	FBgn0241218
FBgn0031195	FBgn0189101	FBgn0235377
FBgn0250837	FBgn0195124	FBgn0068007
FBgn0032773	FBgn0193187	FBgn0230384
FBgn0002174	FBgn0183528	FBgn0231933
FBgn0010433	FBgn0190053	FBgn0242910
FBgn0260745	FBgn0192080	FBgn0241673
FBgn0035049	FBgn0196240	FBgn0229230
FBgn0020304	FBgn0194332	FBgn0233448
FBgn0031374	FBgn0194509	FBgn0235225
FBgn0037395	FBgn0191062	FBgn0068328
FBgn0259222	FBgn0190874	FBgn0242744
FBgn0033807	FBgn0197190	FBgn0231065
FBgn0051676	FBgn0195635	FBgn0230598
FBgn0264326	FBgn0192467	FBgn0228233
FBgn0010408	FBgn0184637	FBgn0068046
FBgn0020767	FBgn0196942	FBgn0230044
FBgn0262730	FBgn0188374	FBgn0234230
FBgn0035917	FBgn0185806	FBgn0238062
FBgn0034598	FBgn0196533	FBgn0231392
FBgn0026575	FBgn0188846	FBgn0234749
FBgn0261571	FBgn0042860	FBgn0042725
FBgn0053988	FBgn0196239	FBgn0229229
FBgn0035047	FBgn0183630	FBgn0232042
FBgn0030320	FBgn0187630	FBgn0235064
FBgn0032955	FBgn0193059	FBgn0230694
FBgn0083945	FBgn0195034	FBgn0236278
FBgn0259166	FBgn0187512	FBgn0233667
FBgn0261564	FBgn0183466	FBgn0231868
FBgn0034246	FBgn0084576	FBgn0084944
FBgn0039707	FBgn0192906	FBgn0241039
FBgn0085427	FBgn0194952	FBgn0236191
FBgn0264442	FBgn0195143	FBgn0235930
FBgn0031959	FBgn0193862	FBgn0235750
FBgn0085410	FBgn0194752	FBgn0242750
FBgn0035755	FBgn0184800	FBgn0237746
FBgn0035708	FBgn0185660	FBgn0238826
FBgn0086711	FBgn0193393	FBgn0241857
FBgn0085404	FBgn0189941	FBgn0241138
FBgn0037409	FBgn0191333	FBgn0228063
FBgn0264489	FBgn0185906	FBgn0238969
FBgn0033368	FBgn0181885	FBgn0239847
FBgn0039260	FBgn0189780	FBgn0228592
FBgn0011286	FBgn0182374	FBgn0236585
FBgn0030964	FBgn0188967	FBgn0235198
FBgn0261261	FBgn0191302	FBgn0228037
FBgn0038816	FBgn0190866	FBgn0242739
FBgn0261565	FBgn0186356	FBgn0237218
FBgn0038391	FBgn0190573	FBgn0241479
FBgn0262872	FBgn0194833	FBgn0231972
FBgn0031926	FBgn0183765	FBgn0232182
FBgn0002887	FBgn0194921	FBgn0236160
FBgn0034159	FBgn0196805	FBgn0231664
FBgn0037098	FBgn0183846	FBgn0239543
FBgn0264561	FBgn0183850	FBgn0239549
FBgn0263077	FBgn0187018	FBgn0236496
FBgn0263456	FBgn0185845	FBgn0238101
FBgn0259211	FBgn0183071	FBgn0067967
FBgn0030412	FBgn0270630	FBgn0234508
FBgn0086368	FBgn0188134	FBgn0234137
FBgn0016120	FBgn0084335	FBgn0068541
FBgn0259216	FBgn0187143	FBgn0232144
FBgn0016715	FBgn0185236	FBgn0238296
FBgn0035490	FBgn0185506	FBgn0238665
FBgn0036691	FBgn0186366	FBgn0237227
FBgn0036695	FBgn0186368	FBgn0237228
FBgn0036698	FBgn0186371	FBgn0237231
FBgn0035416	FBgn0185445	FBgn0238603
FBgn0003415	FBgn0183884	FBgn0239587
FBgn0035435	FBgn0185050	FBgn0237998
FBgn0004910	FBgn0185030	FBgn0237971
FBgn0035470	FBgn0189151	FBgn0237974
FBgn0035449	FBgn0185045	FBgn0237989
FBgn0030177	FBgn0188550	FBgn0235270
FBgn0035155	FBgn0185279	FBgn0238377
FBgn0035640	FBgn0189145	FBgn0237845
FBgn0035601	FBgn0184923	FBgn0068005
FBgn0040843	FBgn0184935	FBgn0237883
FBgn0035833	FBgn0184745	FBgn0237692
FBgn0040512	FBgn0184180	FBgn0239424
FBgn0027500	FBgn0184187	FBgn0239434
FBgn0036643	FBgn0184188	FBgn0239436
FBgn0036641	FBgn0184189	FBgn0239437
FBgn0004569	FBgn0184196	FBgn0239447
FBgn0036742	FBgn0186396	FBgn0237252
FBgn0052182	FBgn0186401	FBgn0237256
FBgn0035762	FBgn0185700	FBgn0238859
FBgn0052068	FBgn0185940	FBgn0239003
FBgn0024187	FBgn0184751	FBgn0237698
FBgn0036463	FBgn0184316	FBgn0237320
FBgn0035771	FBgn0185705	FBgn0068215
FBgn0259935	FBgn0185712	FBgn0238869
FBgn0036489	FBgn0184296	FBgn0237186
FBgn0015946	FBgn0184079	FBgn0239308
FBgn0036775	FBgn0189113	FBgn0239319
FBgn0036908	FBgn0183986	FBgn0239686
FBgn0052392	FBgn0184831	FBgn0237782
FBgn0035697	FBgn0184852	FBgn0237802
FBgn0085300	FBgn0184864	FBgn0237814
FBgn0035685	FBgn0184865	FBgn0237815
FBgn0037142	FBgn0186682	FBgn0239811
FBgn0034489	FBgn0082717	FBgn0231466
FBgn0266186	FBgn0181823	FBgn0239249
FBgn0033543	FBgn0197239	FBgn0068467
FBgn0033539	FBgn0197241	FBgn0230788
FBgn0033879	FBgn0197020	FBgn0068271
FBgn0035026	FBgn0196255	FBgn0229246
FBgn0050324	FBgn0196835	FBgn0231701
FBgn0034786	FBgn0196416	FBgn0229427
FBgn0038302	FBgn0190502	FBgn0241405
FBgn0038304	FBgn0190503	FBgn0241406
FBgn0004101	FBgn0183591	FBgn0232006
FBgn0016691	FBgn0190510	FBgn0241413
FBgn0034177	FBgn0182990	FBgn0229434
FBgn0062449	FBgn0182573	FBgn0230121
FBgn0033446	FBgn0181827	FBgn0239302
FBgn0027589	FBgn0181828	FBgn0239313
FBgn0050089	FBgn0182893	FBgn0229527
FBgn0004003	FBgn0183186	FBgn0229802
FBgn0034697	FBgn0196455	FBgn0068154
FBgn0034693	FBgn0196457	FBgn0231307
FBgn0034664	FBgn0196473	FBgn0231328
FBgn0000008	FBgn0269458	FBgn0231782
FBgn0034707	FBgn0183391	FBgn0231786
FBgn0022740	FBgn0183064	FBgn0229682
FBgn0033195	FBgn0182011	FBgn0240949
FBgn0034455	FBgn0183212	FBgn0229834
FBgn0034457	FBgn0183214	FBgn0229836
FBgn0034485	FBgn0082755	FBgn0229864
FBgn0003977	FBgn0196370	FBgn0229377
FBgn0038309	FBgn0191843	FBgn0243424
FBgn0034223	FBgn0196769	FBgn0231811
FBgn0016970	FBgn0182419	FBgn0236626
FBgn0051155	FBgn0191847	FBgn0243428
FBgn0034859	FBgn0196363	FBgn0229371
FBgn0034734	FBgn0183414	FBgn0231625
FBgn0038394	FBgn0190577	FBgn0241483
FBgn0034743	FBgn0183419	FBgn0068317
FBgn0033382	FBgn0182401	FBgn0236611
FBgn0037324	FBgn0191110	FBgn0242364
FBgn0033737	FBgn0197120	FBgn0231121
FBgn0034617	FBgn0196519	FBgn0231375
FBgn0034606	FBgn0196527	FBgn0231384
FBgn0034532	FBgn0183268	FBgn0229895
FBgn0034566	FBgn0183293	FBgn0229920
FBgn0010411	FBgn0064360	FBgn0064254
FBgn0034504	FBgn0183251	FBgn0229875
FBgn0034310	FBgn0085969	FBgn0231572
FBgn0013467	FBgn0182857	FBgn0231292
FBgn0033277	FBgn0187037	FBgn0236545
FBgn0261588	FBgn0182328	FBgn0236551
FBgn0033340	FBgn0182377	FBgn0236588
FBgn0033608	FBgn0182549	FBgn0230591
FBgn0024188	FBgn0187061	FBgn0230104
FBgn0041241	FBgn0187062	FBgn0230105
FBgn0033635	FBgn0182561	FBgn0068240
FBgn0086784	FBgn0181913	FBgn0239984
FBgn0085246	FBgn0186957	FBgn0240406
FBgn0259878	FBgn0196915	FBgn0230013
FBgn0003114	FBgn0040413	FBgn0064247
FBgn0034567	FBgn0196551	FBgn0231410
FBgn0266420	FBgn0196696	FBgn0231562
FBgn0033491	FBgn0182484	FBgn0236690
FBgn0033500	FBgn0182488	FBgn0236694
FBgn0033502	FBgn0182491	FBgn0236696
FBgn0034618	FBgn0183328	FBgn0229954
FBgn0034622	FBgn0183332	FBgn0229955
FBgn0002069	FBgn0182688	FBgn0068540
FBgn0260972	FBgn0181876	FBgn0239751
FBgn0004367	FBgn0188845	FBgn0234747
FBgn0050411	FBgn0183500	FBgn0231904
FBgn0041234	FBgn0183511	FBgn0231915
FBgn0050185	FBgn0183512	FBgn0231916
FBgn0026326	FBgn0181861	FBgn0239624
FBgn0022029	FBgn0183014	FBgn0229455
FBgn0023180	FBgn0181822	FBgn0239239
FBgn0034473	FBgn0196604	FBgn0231477
FBgn0046880	FBgn0196606	FBgn0231480
FBgn0003520	FBgn0196711	FBgn0231577
FBgn0003545	FBgn0196739	FBgn0231603
FBgn0067102	FBgn0183382	FBgn0229997
FBgn0034694	FBgn0183383	FBgn0229999
FBgn0034430	FBgn0196628	FBgn0231501
FBgn0015247	FBgn0196873	FBgn0068139
FBgn0010316	FBgn0182445	FBgn0236648
FBgn0085444	FBgn0196798	FBgn0231850
FBgn0034982	FBgn0196283	FBgn0229283
FBgn0010409	FBgn0196759	FBgn0068077
FBgn0034755	FBgn0196426	FBgn0229636
FBgn0050195	FBgn0196427	FBgn0229638
FBgn0263240	FBgn0182025	FBgn0241091
FBgn0033827	FBgn0182723	FBgn0230271
FBgn0033072	FBgn0182101	FBgn0236764
FBgn0262867	FBgn0182103	FBgn0236766
FBgn0033062	FBgn0182107	FBgn0236770
FBgn0284246	FBgn0182109	FBgn0236772
FBgn0033052	FBgn0186982	FBgn0236775
FBgn0033038	FBgn0182122	FBgn0236785
FBgn0263133	FBgn0193908	FBgn0235790
FBgn0000018	FBgn0193617	FBgn0230830
FBgn0053129	FBgn0193618	FBgn0230839
FBgn0032312	FBgn0193623	FBgn0230892
FBgn0065110	FBgn0193663	FBgn0231274
FBgn0032181	FBgn0193714	FBgn0243461
FBgn0032171	FBgn0193726	FBgn0227997
FBgn0031820	FBgn0194796	FBgn0231535
FBgn0031830	FBgn0067177	FBgn0068491
FBgn0032414	FBgn0195191	FBgn0235982
FBgn0032416	FBgn0195194	FBgn0235983
FBgn0032447	FBgn0195219	FBgn0236005
FBgn0283682	FBgn0193605	FBgn0230738
FBgn0032788	FBgn0195560	FBgn0230946
FBgn0032798	FBgn0195566	FBgn0230951
FBgn0032486	FBgn0268265	FBgn0236031
FBgn0028919	FBgn0195292	FBgn0236083
FBgn0260011	FBgn0195316	FBgn0068398
FBgn0024191	FBgn0194745	FBgn0085894
FBgn0028879	FBgn0195353	FBgn0238138
FBgn0027490	FBgn0193806	FBgn0228808
FBgn0031423	FBgn0194232	FBgn0232704
FBgn0032822	FBgn0195582	FBgn0230967
FBgn0045064	FBgn0195590	FBgn0230979
FBgn0028467	FBgn0194807	FBgn0231672
FBgn0035060	FBgn0196236	FBgn0229228
FBgn0032881	FBgn0193105	FBgn0231208
FBgn0032008	FBgn0194896	FBgn0236140
FBgn0032020	FBgn0194901	FBgn0068238
FBgn0032025	FBgn0194905	FBgn0068239
FBgn0031563	FBgn0194129	FBgn0232401
FBgn0001084	FBgn0193810	FBgn0228825
FBgn0032033	FBgn0193815	FBgn0228857
FBgn0086446	FBgn0195539	FBgn0068385
FBgn0032771	FBgn0195547	FBgn0230934
FBgn0032772	FBgn0195548	FBgn0230935
FBgn0040211	FBgn0195140	FBgn0235928
FBgn0003896	FBgn0193221	FBgn0230421
FBgn0002121	FBgn0194388	FBgn0234042
FBgn0024920	FBgn0194184	FBgn0232564
FBgn0031463	FBgn0194195	FBgn0232612
FBgn0051908	FBgn0193919	FBgn0235801
FBgn0010382	FBgn0193359	FBgn0236736
FBgn0067779	FBgn0194389	FBgn0234053
FBgn0032705	FBgn0195508	FBgn0230898
FBgn0032633	FBgn0193292	FBgn0230837
FBgn0031494	FBgn0194589	FBgn0235634
FBgn0000318	FBgn0194731	FBgn0067992
FBgn0031304	FBgn0194460	FBgn0234791
FBgn0051922	FBgn0194468	FBgn0234875
FBgn0032753	FBgn0193203	FBgn0230402
FBgn0032030	FBgn0194910	FBgn0236152
FBgn0032032	FBgn0194911	FBgn0236153
FBgn0032034	FBgn0194912	FBgn0236154
FBgn0015299	FBgn0194892	FBgn0236136
FBgn0051679	FBgn0194250	FBgn0232767
FBgn0010288	FBgn0194259	FBgn0232790
FBgn0032600	FBgn0195434	FBgn0230483
FBgn0086673	FBgn0195442	FBgn0230491
FBgn0032368	FBgn0183714	FBgn0230485
FBgn0000052	FBgn0194006	FBgn0236323
FBgn0028531	FBgn0268695	FBgn0277369
FBgn0032717	FBgn0193226	FBgn0230427
FBgn0043002	FBgn0194920	FBgn0068177
FBgn0032052	FBgn0194929	FBgn0068450
FBgn0052988	FBgn0194947	FBgn0236184
FBgn0031729	FBgn0194742	FBgn0242623
FBgn0053307	FBgn0193447	FBgn0229191
FBgn0028658	FBgn0193457	FBgn0229253
FBgn0032465	FBgn0193506	FBgn0229767
FBgn0032434	FBgn0193529	FBgn0230018
FBgn0028572	FBgn0185902	FBgn0229145
FBgn0011584	FBgn0195026	FBgn0236268
FBgn0032225	FBgn0195059	FBgn0236300
FBgn0027052	FBgn0066168	FBgn0066136
FBgn0086758	FBgn0194496	FBgn0235110
FBgn0086683	FBgn0189261	FBgn0228807
FBgn0030551	FBgn0187513	FBgn0233668
FBgn0030552	FBgn0188731	FBgn0234609
FBgn0037312	FBgn0191117	FBgn0242373
FBgn0037282	FBgn0191142	FBgn0242406
FBgn0026620	FBgn0191152	FBgn0067922
FBgn0039152	FBgn0192520	FBgn0240631
FBgn0039155	FBgn0192524	FBgn0240635
FBgn0039563	FBgn0189588	FBgn0228382
FBgn0038977	FBgn0189977	FBgn0241173
FBgn0285913	FBgn0190463	FBgn0241356
FBgn0013767	FBgn0064364	FBgn0241360
FBgn0039764	FBgn0188693	FBgn0240585
FBgn0039505	FBgn0186806	FBgn0240887
FBgn0005659	FBgn0192788	FBgn0240917
FBgn0027527	FBgn0191337	FBgn0228067
FBgn0037419	FBgn0191341	FBgn0228072
FBgn0037429	FBgn0191351	FBgn0068411
FBgn0045866	FBgn0192611	FBgn0240721
FBgn0039463	FBgn0192753	FBgn0240860
FBgn0003227	FBgn0191801	FBgn0243388
FBgn0010770	FBgn0190899	FBgn0242766
FBgn0038860	FBgn0190901	FBgn0242768
FBgn0250754	FBgn0191760	FBgn0243340
FBgn0040271	FBgn0191774	FBgn0243354
FBgn0038961	FBgn0189986	FBgn0241181
FBgn0037665	FBgn0190120	FBgn0242982
FBgn0285911	FBgn0190125	FBgn0242987
FBgn0014427	FBgn0083468	FBgn0240996
FBgn0062442	FBgn0189452	FBgn0228326
FBgn0037949	FBgn0192101	FBgn0227967
FBgn0040529	FBgn0192335	FBgn0241953
FBgn0265351	FBgn0192338	FBgn0241959
FBgn0038810	FBgn0190862	FBgn0242734
FBgn0038332	FBgn0191825	FBgn0243407
FBgn0243512	FBgn0190036	FBgn0242899
FBgn0002578	FBgn0082722	FBgn0082695
FBgn0086605	FBgn0191172	FBgn0242432
FBgn0037229	FBgn0191183	FBgn0242442
FBgn0053189	FBgn0192303	FBgn0241923
FBgn0037609	FBgn0192313	FBgn0241935
FBgn0011774	FBgn0190271	FBgn0243132
FBgn0037897	FBgn0190273	FBgn0243134
FBgn0038504	FBgn0191713	FBgn0241301
FBgn0067629	FBgn0190491	FBgn0241391
FBgn0087021	FBgn0082402	FBgn0082377
FBgn0051342	FBgn0190380	FBgn0243262
FBgn0037546	FBgn0190032	FBgn0242896
FBgn0027493	FBgn0191510	FBgn0242123
FBgn0038058	FBgn0192029	FBgn0241626
FBgn0038035	FBgn0192039	FBgn0241636
FBgn0020493	FBgn0190641	FBgn0241716
FBgn0039273	FBgn0270919	FBgn0228586
FBgn0051249	FBgn0186767	FBgn0242336
FBgn0039846	FBgn0188051	FBgn0240512
FBgn0038877	FBgn0191477	FBgn0242093
FBgn0039348	FBgn0189723	FBgn0228530
FBgn0037645	FBgn0270820	FBgn0241912
FBgn0037220	FBgn0191187	FBgn0242446
FBgn0014135	FBgn0191581	FBgn0242200
FBgn0038168	FBgn0191952	FBgn0241540
FBgn0044511	FBgn0191975	FBgn0241563
FBgn0038129	FBgn0191984	FBgn0241574
FBgn0039300	FBgn0189756	FBgn0068510
FBgn0038233	FBgn0191889	FBgn0243468
FBgn0020299	FBgn0190474	FBgn0241372
FBgn0037807	FBgn0192190	FBgn0241796
FBgn0037798	FBgn0268482	FBgn0241799
FBgn0260962	FBgn0190391	FBgn0243275
FBgn0004666	FBgn0190394	FBgn0243277
FBgn0015778	FBgn0190427	FBgn0243314
FBgn0037475	FBgn0191398	FBgn0242002
FBgn0037501	FBgn0191418	FBgn0229003
FBgn0003015	FBgn0190102	FBgn0242963
FBgn0037676	FBgn0192270	FBgn0241891
FBgn0002522	FBgn0191028	FBgn0242889
FBgn0038524	FBgn0190676	FBgn0242551
FBgn0038275	FBgn0190494	FBgn0241394
FBgn0037756	FBgn0190166	FBgn0243034
FBgn0002905	FBgn0192015	FBgn0241605
FBgn0259152	FBgn0192628	FBgn0240737
FBgn0000015	FBgn0025043	FBgn0243162
FBgn0038446	FBgn0191755	FBgn0243180
FBgn0028381	FBgn0191756	FBgn0243183
FBgn0038440	FBgn0270398	FBgn0243184
FBgn0082831	FBgn0190346	FBgn0243226
FBgn0005674	FBgn0189862	FBgn0228677
FBgn0053203	FBgn0189553	FBgn0228348
FBgn0038833	FBgn0085026	FBgn0084486
FBgn0038921	FBgn0192371	FBgn0228133
FBgn0038272	FBgn0191867	FBgn0243448
FBgn0038269	FBgn0191869	FBgn0243450
FBgn0262127	FBgn0191877	FBgn0243454
FBgn0264291	FBgn0190652	FBgn0227998
FBgn0037608	FBgn0190083	FBgn0242943
FBgn0037630	FBgn0190097	FBgn0242957
FBgn0010225	FBgn0046913	FBgn0046891
FBgn0041621	FBgn0191202	FBgn0242475
FBgn0027865	FBgn0189698	FBgn0228506
FBgn0037878	FBgn0192141	FBgn0241746
FBgn0037873	FBgn0192145	FBgn0068269
FBgn0039020	FBgn0189951	FBgn0241149
FBgn0038829	FBgn0191513	FBgn0242125
FBgn0051463	FBgn0190056	FBgn0242913
FBgn0037566	FBgn0269389	FBgn0242914
FBgn0062412	FBgn0186814	FBgn0242918
FBgn0037581	FBgn0190062	FBgn0242924
FBgn0037917	FBgn0190285	FBgn0241314
FBgn0037933	FBgn0190295	FBgn0241325
FBgn0003334	FBgn0192240	FBgn0241858
FBgn0039650	FBgn0189474	FBgn0228328
FBgn0010803	FBgn0192272	FBgn0241892
FBgn0260935	FBgn0192276	FBgn0241896
FBgn0038686	FBgn0191607	FBgn0242232
FBgn0037712	FBgn0190147	FBgn0243009
FBgn0028499	FBgn0190718	FBgn0242585
FBgn0051446	FBgn0190543	FBgn0241449
FBgn0039584	FBgn0192809	FBgn0240943
FBgn0039589	FBgn0192811	FBgn0240947
FBgn0039602	FBgn0192819	FBgn0240958
FBgn0010926	FBgn0191704	FBgn0242346
FBgn0037418	FBgn0191048	FBgn0241248
FBgn0037399	FBgn0191057	FBgn0241255
FBgn0037369	FBgn0191080	FBgn0241278
FBgn0037603	FBgn0190079	FBgn0242940
FBgn0002772	FBgn0012844	FBgn0015215
FBgn0039525	FBgn0189617	FBgn0228414
FBgn0039120	FBgn0066160	FBgn0066139
FBgn0039094	FBgn0189895	FBgn0241082
FBgn0027539	FBgn0189802	FBgn0228616
FBgn0038196	FBgn0191933	FBgn0227950
FBgn0039733	FBgn0192924	FBgn0241056
FBgn0027579	FBgn0192794	FBgn0240926
FBgn0039172	FBgn0189840	FBgn0228656
FBgn0038683	FBgn0191609	FBgn0242235
FBgn0028292	FBgn0188528	FBgn0235230
FBgn0026411	FBgn0068655	FBgn0234899
FBgn0030108	FBgn0188523	FBgn0235227
FBgn0028397	FBgn0183995	FBgn0233547
FBgn0038815	FBgn0190864	FBgn0242737
FBgn0029867	FBgn0196077	FBgn0234244
FBgn0023510	FBgn0084941	FBgn0084874
FBgn0030342	FBgn0187612	FBgn0235047
FBgn0030366	FBgn0187594	FBgn0234222
FBgn0030360	FBgn0268774	FBgn0234006
FBgn0052683	FBgn0187673	FBgn0232971
FBgn0010416	FBgn0187412	FBgn0233528
FBgn0030742	FBgn0187416	FBgn0233533
FBgn0027521	FBgn0188836	FBgn0228843
FBgn0040324	FBgn0269724	FBgn0232152
FBgn0052281	FBgn0185439	FBgn0238593
FBgn0261723	FBgn0185366	FBgn0238476
FBgn0004574	FBgn0185009	FBgn0237950
FBgn0031068	FBgn0189020	FBgn0233436
FBgn0031094	FBgn0269427	FBgn0233453
FBgn0027334	FBgn0189040	FBgn0068478
FBgn0052767	FBgn0187893	FBgn0234318
FBgn0031099	FBgn0270370	FBgn0232941
FBgn0031098	FBgn0187214	FBgn0232942
FBgn0031070	FBgn0187231	FBgn0231128
FBgn0024352	FBgn0066163	FBgn0066134
FBgn0053120	FBgn0193224	FBgn0230425
FBgn0039190	FBgn0069515	FBgn0228644
FBgn0011785	FBgn0192543	FBgn0240651
FBgn0263490	FBgn0192566	FBgn0240678
FBgn0052816	FBgn0188097	FBgn0234101
FBgn0029912	FBgn0269289	FBgn0234271
FBgn0263005	FBgn0195857	FBgn0233721
FBgn0039930	FBgn0195709	FBgn0232097
FBgn0029753	FBgn0269729	FBgn0233921
FBgn0032895	FBgn0195637	FBgn0230601
FBgn0026702	FBgn0196073	FBgn0233940
FBgn0029966	FBgn0188451	FBgn0233307
FBgn0040285	FBgn0268986	FBgn0068040
FBgn0000617	FBgn0188927	FBgn0235136
FBgn0031596	FBgn0194664	FBgn0235707
FBgn0052554	FBgn0187323	FBgn0233139
FBgn0004655	FBgn0068582	FBgn0234461
FBgn0030625	FBgn0188766	FBgn0234652
FBgn0259190	FBgn0187777	FBgn0234966
FBgn0024365	FBgn0268144	FBgn0234048
FBgn0031190	FBgn0187152	FBgn0232856
FBgn0030456	FBgn0188675	FBgn0234533
FBgn0002579	FBgn0188082	FBgn0068069
FBgn0029785	FBgn0188327	FBgn0068315
FBgn0025739	FBgn0188288	FBgn0233885
FBgn0030327	FBgn0187626	FBgn0082382
FBgn0029521	FBgn0188109	FBgn0234113
FBgn0031661	FBgn0194069	FBgn0236108
FBgn0031659	FBgn0194699	FBgn0068430
FBgn0032409	FBgn0195187	FBgn0235979
FBgn0032518	FBgn0193476	FBgn0229432
FBgn0032512	FBgn0193479	FBgn0229462
FBgn0032511	FBgn0193480	FBgn0068200
FBgn0026679	FBgn0190533	FBgn0234913
FBgn0030793	FBgn0187381	FBgn0233210
FBgn0032150	FBgn0193741	FBgn0228174
FBgn0029688	FBgn0187939	FBgn0234368
FBgn0030645	FBgn0196140	FBgn0234669
FBgn0030660	FBgn0188781	FBgn0068227
FBgn0030673	FBgn0188792	FBgn0234686
FBgn0052638	FBgn0187557	FBgn0233718
FBgn0040382	FBgn0188131	FBgn0234133
FBgn0003159	FBgn0187987	FBgn0234439
FBgn0040389	FBgn0195940	FBgn0234440
FBgn0023524	FBgn0068662	FBgn0234447
FBgn0000810	FBgn0188203	FBgn0276843
FBgn0023545	FBgn0188014	FBgn0234477
FBgn0000316	FBgn0188107	FBgn0043603
FBgn0023531	FBgn0270570	FBgn0234035
FBgn0003048	FBgn0188198	FBgn0233789
FBgn0003463	FBgn0041657	FBgn0041637
FBgn0030839	FBgn0187332	FBgn0235117
FBgn0003411	FBgn0195869	FBgn0234778
FBgn0030915	FBgn0188950	FBgn0235171
FBgn0030029	FBgn0187757	FBgn0234929
FBgn0024993	FBgn0188212	FBgn0233809
FBgn0024980	FBgn0063990	FBgn0068024
FBgn0024995	FBgn0187978	FBgn0234416
FBgn0030844	FBgn0195824	FBgn0233159
FBgn0028974	FBgn0187356	FBgn0233188
FBgn0032119	FBgn0194982	FBgn0236225
FBgn0053299	FBgn0194998	FBgn0236241
FBgn0015393	FBgn0194999	FBgn0236243
FBgn0031961	FBgn0193861	FBgn0235749
FBgn0038974	FBgn0189978	FBgn0241174
FBgn0039642	FBgn0189496	FBgn0228333
FBgn0021750	FBgn0190522	FBgn0241422
FBgn0051301	FBgn0190523	FBgn0241423
FBgn0261792	FBgn0191619	FBgn0242244
FBgn0038788	FBgn0190850	FBgn0242724
FBgn0037751	FBgn0190169	FBgn0243031
FBgn0037958	FBgn0192093	FBgn0227959
FBgn0038589	FBgn0190725	FBgn0242593
FBgn0032509	FBgn0195261	FBgn0236050
FBgn0051852	FBgn0195262	FBgn0236051
FBgn0038590	FBgn0191669	FBgn0242308
FBgn0250820	FBgn0190905	FBgn0242771
FBgn0038476	FBgn0190642	FBgn0241718
FBgn0261113	FBgn0190762	FBgn0242630
FBgn0026634	FBgn0191830	FBgn0243411
FBgn0039686	FBgn0192887	FBgn0241021
FBgn0262112	FBgn0192900	FBgn0241034
FBgn0031538	FBgn0194150	FBgn0232462
FBgn0036374	FBgn0186137	FBgn0239210
FBgn0036365	FBgn0186133	FBgn0239205
FBgn0083978	FBgn0186107	FBgn0239183
FBgn0036319	FBgn0186094	FBgn0239169
FBgn0036780	FBgn0186423	FBgn0237280
FBgn0036811	FBgn0186441	FBgn0237300
FBgn0036813	FBgn0186442	FBgn0068528
FBgn0027088	FBgn0186203	FBgn0239278
FBgn0036487	FBgn0186211	FBgn0239454
FBgn0036488	FBgn0186212	FBgn0239455
FBgn0029094	FBgn0186492	FBgn0067999
FBgn0011769	FBgn0184660	FBgn0238522
FBgn0035800	FBgn0184766	FBgn0237716
FBgn0027615	FBgn0184571	FBgn0237573
FBgn0024945	FBgn0185262	FBgn0238342
FBgn0036124	FBgn0185967	FBgn0239030
FBgn0036740	FBgn0184125	FBgn0239363
FBgn0036662	FBgn0186343	FBgn0237205
FBgn0036681	FBgn0186358	FBgn0237220
FBgn0035593	FBgn0185572	FBgn0238738
FBgn0035591	FBgn0185573	FBgn0238739
FBgn0036298	FBgn0184435	FBgn0237432
FBgn0035241	FBgn0189161	FBgn0084779
FBgn0036342	FBgn0186111	FBgn0239186
FBgn0031606	FBgn0194106	FBgn0232316
FBgn0035153	FBgn0185230	FBgn0238289
FBgn0037019	FBgn0183901	FBgn0239607
FBgn0032910	FBgn0193085	FBgn0230717
FBgn0035444	FBgn0185462	FBgn0238625
FBgn0035471	FBgn0185486	FBgn0238649
FBgn0016794	FBgn0185401	FBgn0237643
FBgn0044452	FBgn0084221	FBgn0084503
FBgn0035393	FBgn0185431	FBgn0237672
FBgn0035397	FBgn0185432	FBgn0237673
FBgn0015391	FBgn0193316	FBgn0230862
FBgn0035422	FBgn0185054	FBgn0068458
FBgn0036619	FBgn0184207	FBgn0240108
FBgn0086698	FBgn0269954	FBgn0233065
FBgn0020224	FBgn0185786	FBgn0238043
FBgn0024179	FBgn0185017	FBgn0237958
FBgn0035150	FBgn0185274	FBgn0238376
FBgn0036206	FBgn0184502	FBgn0237501
FBgn0036187	FBgn0184514	FBgn0237513
FBgn0053635	FBgn0194372	FBgn0233901
FBgn0036771	FBgn0186410	FBgn0237265
FBgn0036402	FBgn0186155	FBgn0239229
FBgn0036423	FBgn0268579	FBgn0239245
FBgn0036433	FBgn0186176	FBgn0239251
FBgn0036336	FBgn0186105	FBgn0239182
FBgn0044051	FBgn0185903	FBgn0238965
FBgn0035852	FBgn0184733	FBgn0238592
FBgn0020392	FBgn0184736	FBgn0237683
FBgn0035528	FBgn0184987	FBgn0068415
FBgn0024806	FBgn0197002	FBgn0238315
FBgn0036255	FBgn0186045	FBgn0239129
FBgn0027903	FBgn0185354	FBgn0238460
FBgn0035313	FBgn0185372	FBgn0238481
FBgn0020386	FBgn0185255	FBgn0238333
FBgn0265574	FBgn0196994	FBgn0238307
FBgn0035325	FBgn0185382	FBgn0237627
FBgn0027547	FBgn0185133	FBgn0238184
FBgn0036282	FBgn0184451	FBgn0237448
FBgn0052104	FBgn0184452	FBgn0237449
FBgn0036274	FBgn0184457	FBgn0237453
FBgn0011455	FBgn0184473	FBgn0067956
FBgn0036254	FBgn0184474	FBgn0237470
FBgn0035482	FBgn0185496	FBgn0238653
FBgn0035232	FBgn0185178	FBgn0238236
FBgn0035522	FBgn0185527	FBgn0238692
FBgn0035523	FBgn0185528	FBgn0238693
FBgn0035539	FBgn0185538	FBgn0238702
FBgn0027085	FBgn0185560	FBgn0238726
FBgn0035848	FBgn0185751	FBgn0238911
FBgn0036301	FBgn0184433	FBgn0237430
FBgn0036004	FBgn0185875	FBgn0238137
FBgn0036335	FBgn0184408	FBgn0237405
FBgn0040318	FBgn0184341	FBgn0237340
FBgn0036184	FBgn0186001	FBgn0239074
FBgn0038134	FBgn0191980	FBgn0241571
FBgn0262359	FBgn0270231	FBgn0228915
FBgn0002524	FBgn0195370	FBgn0238294
FBgn0024728	FBgn0193733	FBgn0232156
FBgn0265998	FBgn0192825	FBgn0240969
FBgn0039431	FBgn0189676	FBgn0228482
FBgn0027596	FBgn0196929	FBgn0230030
FBgn0038425	FBgn0190606	FBgn0241515
FBgn0020269	FBgn0196949	FBgn0230052
FBgn0052479	FBgn0185291	FBgn0238385
FBgn0037849	FBgn0190243	FBgn0243102
FBgn0005596	FBgn0189528	FBgn0228337
FBgn0052183	FBgn0186400	FBgn0237255
FBgn0038420	FBgn0191772	FBgn0243351
FBgn0033752	FBgn0182658	FBgn0230216
FBgn0035308	FBgn0185124	FBgn0238174
FBgn0036725	FBgn0189195	FBgn0237241
FBgn0030617	FBgn0187477	FBgn0277285
FBgn0263102	FBgn0182509	FBgn0230545
FBgn0265194	FBgn0196913	FBgn0230011
FBgn0261610	FBgn0188339	FBgn0233956
FBgn0034491	FBgn0082756	FBgn0229866
FBgn0031628	FBgn0194685	FBgn0235731
FBgn0028554	FBgn0193935	FBgn0235813
FBgn0031568	FBgn0194639	FBgn0235682
FBgn0027598	FBgn0192974	FBgn0228736
FBgn0051068	FBgn0186804	FBgn0240882
FBgn0051784	FBgn0193297	FBgn0230843
FBgn0034570	FBgn0183295	FBgn0229922
FBgn0010315	FBgn0187433	FBgn0233561
FBgn0261509	FBgn0194494	FBgn0235089
FBgn0039914	FBgn0187141	FBgn0232112
FBgn0270925	FBgn0190833	FBgn0242702
FBgn0031118	FBgn0187199	FBgn0232923
FBgn0053144	FBgn0197237	FBgn0230782
FBgn0025643	FBgn0063992	FBgn0233822
FBgn0027330	FBgn0187733	FBgn0234900
FBgn0030034	FBgn0191580	FBgn0233344
FBgn0038303	FBgn0191848	FBgn0243429
FBgn0024236	FBgn0185793	FBgn0238051
FBgn0035533	FBgn0184984	FBgn0237929
FBgn0285912	FBgn0192605	FBgn0240714
FBgn0085191	FBgn0195153	FBgn0235941
FBgn0029801	FBgn0188337	FBgn0233954
FBgn0030581	FBgn0068698	FBgn0233647
FBgn0262714	FBgn0186089	FBgn0239163
FBgn0034914	FBgn0183540	FBgn0231945
FBgn0037313	FBgn0191267	FBgn0242528
FBgn0051184	FBgn0192508	FBgn0276979
FBgn0032482	FBgn0195242	FBgn0068101
FBgn0037856	FBgn0190245	FBgn0243104
FBgn0260933	FBgn0194345	FBgn0233591
FBgn0035625	FBgn0269951	FBgn0238758
FBgn0053108	FBgn0270102	FBgn0240621
FBgn0003495	FBgn0067488	FBgn0067424
FBgn0035610	FBgn0184915	FBgn0237867
FBgn0027518	FBgn0189225	FBgn0228293
FBgn0038290	FBgn0191855	FBgn0243436
FBgn0027948	FBgn0190579	FBgn0241485
FBgn0264001	FBgn0184378	FBgn0237378
FBgn0025390	FBgn0188035	FBgn0234037
FBgn0038294	FBgn0191853	FBgn0068265
FBgn0027574	FBgn0192764	FBgn0240874
FBgn0032666	FBgn0195487	FBgn0230876
FBgn0036239	FBgn0184480	FBgn0237475
FBgn0031571	FBgn0194644	FBgn0235688
FBgn0003423	FBgn0189084	FBgn0235362
FBgn0025777	FBgn0193948	FBgn0235828
FBgn0000163	FBgn0188891	FBgn0235097
FBgn0031731	FBgn0194036	FBgn0236352
FBgn0036202	FBgn0184506	FBgn0237505
FBgn0261545	FBgn0182679	FBgn0230234
FBgn0036621	FBgn0184205	FBgn0240107
FBgn0037135	FBgn0186677	FBgn0239806
FBgn0027588	FBgn0182326	FBgn0232874
FBgn0027554	FBgn0184750	FBgn0237697
FBgn0036812	FBgn0184060	FBgn0068113
FBgn0266053	FBgn0270889	FBgn0241715
FBgn0264785	FBgn0191261	FBgn0242526
FBgn0030270	FBgn0269068	FBgn0234789
FBgn0259818	FBgn0194376	FBgn0233932
FBgn0035505	FBgn0185005	FBgn0237946
FBgn0030744	FBgn0187413	FBgn0233529
FBgn0085430	FBgn0196180	FBgn0235205
FBgn0261086	FBgn0191178	FBgn0242439
FBgn0051368	FBgn0190305	FBgn0241338
FBgn0051374	FBgn0192124	FBgn0241729
FBgn0026262	FBgn0187142	FBgn0232117
FBgn0260658	FBgn0187942	FBgn0234372
FBgn0039490	FBgn0269031	FBgn0240877
FBgn0032911	FBgn0195638	FBgn0230606
FBgn0050340	FBgn0181837	FBgn0239398
FBgn0034720	FBgn0196445	FBgn0229477
FBgn0020620	FBgn0197006	FBgn0068088
FBgn0262788	FBgn0268712	FBgn0238546
FBgn0030544	FBgn0187514	FBgn0233670
FBgn0259682	FBgn0196658	FBgn0231531
FBgn0026428	FBgn0068659	FBgn0234659
FBgn0033015	FBgn0268908	FBgn0229066
FBgn0000541	FBgn0185240	FBgn0238316
FBgn0037228	FBgn0191203	FBgn0242476
FBgn0051992	FBgn0195715	FBgn0232110
FBgn0016977	FBgn0194399	FBgn0234136
FBgn0050183	FBgn0196336	FBgn0229344
FBgn0034433	FBgn0196627	FBgn0231500
FBgn0003310	FBgn0194325	FBgn0233375
FBgn0035604	FBgn0184921	FBgn0237872
FBgn0039631	FBgn0192846	FBgn0240986
FBgn0030889	FBgn0188940	FBgn0235151
FBgn0015269	FBgn0192705	FBgn0240813
FBgn0031265	FBgn0194424	FBgn0234403
FBgn0036159	FBgn0185990	FBgn0239055
FBgn0003514	FBgn0041656	FBgn0067924
FBgn0002431	FBgn0041664	FBgn0041642
FBgn0085398	FBgn0189451	FBgn0229990
FBgn0085433	FBgn0191828	FBgn0243410
FBgn0030892	FBgn0187315	FBgn0233126
FBgn0034742	FBgn0196434	FBgn0229645
FBgn0261383	FBgn0187864	FBgn0234285
FBgn0019990	FBgn0193001	FBgn0228771
FBgn0033448	FBgn0268416	FBgn0239271
FBgn0038532	FBgn0190684	FBgn0242557
FBgn0037623	FBgn0192309	FBgn0241930
FBgn0051038	FBgn0192912	FBgn0241044
FBgn0000028	FBgn0187465	FBgn0233604
FBgn0087008	FBgn0187236	FBgn0234837
FBgn0085474	FBgn0270506	FBgn0229637
FBgn0051145	FBgn0189894	FBgn0241081
FBgn0037980	FBgn0192077	FBgn0241670
FBgn0050372	FBgn0268428	FBgn0240508
FBgn0036814	FBgn0184058	FBgn0239286
FBgn0034282	FBgn0196728	FBgn0231593
FBgn0037734	FBgn0270700	FBgn0241849
FBgn0052029	FBgn0185807	FBgn0238063
FBgn0034419	FBgn0183179	FBgn0229795
FBgn0029504	FBgn0269497	FBgn0234975
FBgn0023407	FBgn0193468	FBgn0229358
FBgn0083973	FBgn0268565	FBgn0277016
FBgn0033897	FBgn0186903	FBgn0230088
FBgn0035815	FBgn0184757	FBgn0237707
FBgn0003429	FBgn0192574	FBgn0240685
FBgn0264503	FBgn0196022	FBgn0235278
FBgn0030098	FBgn0188515	FBgn0233393
FBgn0038839	FBgn0191506	FBgn0242118
FBgn0031359	FBgn0194294	FBgn0233054
FBgn0028476	FBgn0192863	FBgn0240997
FBgn0001989	FBgn0193358	FBgn0236735
FBgn0250862	FBgn0188669	FBgn0234528
FBgn0039282	FBgn0192629	FBgn0240738
FBgn0037435	FBgn0191356	FBgn0228086
FBgn0260753	FBgn0268844	FBgn0233796
FBgn0031621	FBgn0194681	FBgn0235728
FBgn0000247	FBgn0192904	FBgn0241037
FBgn0039600	FBgn0192818	FBgn0240957
FBgn0038535	FBgn0191697	FBgn0242338
FBgn0036305	FBgn0186084	FBgn0239159
FBgn0264090	FBgn0196183	FBgn0235210
FBgn0033108	FBgn0182200	FBgn0236440
FBgn0051158	FBgn0192422	FBgn0228183
FBgn0035607	FBgn0185584	FBgn0238750
FBgn0004595	FBgn0025030	FBgn0243130
FBgn0035028	FBgn0183615	FBgn0232029
FBgn0004875	FBgn0185482	FBgn0238643
FBgn0037565	FBgn0192339	FBgn0241960
FBgn0039849	FBgn0188031	FBgn0240510
FBgn0039197	FBgn0189824	FBgn0228639
FBgn0033000	FBgn0269791	FBgn0277327
FBgn0263197	FBgn0196760	FBgn0231621
FBgn0250755	FBgn0187866	FBgn0240491
FBgn0032681	FBgn0193251	FBgn0230453
FBgn0039667	FBgn0192873	FBgn0241005
FBgn0032620	FBgn0193303	FBgn0230847
FBgn0260442	FBgn0185795	FBgn0238053
FBgn0050022	FBgn0269658	FBgn0231190
FBgn0013725	FBgn0196964	FBgn0230066
FBgn0031312	FBgn0194465	FBgn0234842
FBgn0031251	FBgn0194354	FBgn0233695
FBgn0037448	FBgn0191366	FBgn0228098
FBgn0036974	FBgn0186548	FBgn0237004
FBgn0041243	FBgn0182038	FBgn0241231
FBgn0260795	FBgn0185972	FBgn0239037
FBgn0083969	FBgn0192911	FBgn0241043
FBgn0035936	FBgn0185825	FBgn0068008
FBgn0051431	FBgn0192361	FBgn0228120
FBgn0032029	FBgn0194909	FBgn0236151
FBgn0032170	FBgn0195021	FBgn0236264
FBgn0033739	FBgn0182651	FBgn0230208
FBgn0039054	FBgn0189932	FBgn0241128
FBgn0033652	FBgn0182577	FBgn0230125
FBgn0046225	FBgn0268707	FBgn0243139
FBgn0028901	FBgn0270853	FBgn0238421
FBgn0051716	FBgn0195070	FBgn0236309
FBgn0002023	FBgn0193200	FBgn0230399
FBgn0002567	FBgn0181870	FBgn0239687
FBgn0011653	FBgn0185007	FBgn0237948
FBgn0043070	FBgn0183340	FBgn0229961
FBgn0016032	FBgn0187005	FBgn0236462
FBgn0038256	FBgn0191876	FBgn0243453
FBgn0034031	FBgn0182884	FBgn0229514
FBgn0035845	FBgn0184738	FBgn0237684
FBgn0030358	FBgn0187603	FBgn0235038
FBgn0000037	FBgn0196275	FBgn0229272
FBgn0264270	FBgn0016343	FBgn0235003
FBgn0027657	FBgn0191792	FBgn0243377
FBgn0034718	FBgn0196447	FBgn0229480
FBgn0027660	FBgn0184142	FBgn0067942
FBgn0031052	FBgn0268268	FBgn0233424
FBgn0039396	FBgn0189696	FBgn0228504
FBgn0003071	FBgn0182479	FBgn0068100
FBgn0014859	FBgn0193111	FBgn0231212
FBgn0033127	FBgn0182216	FBgn0236455
FBgn0261089	FBgn0183772	FBgn0230521
FBgn0032516	FBgn0193477	FBgn0229442
FBgn0036746	FBgn0184119	FBgn0239359
FBgn0027866	FBgn0191177	FBgn0242437
FBgn0035998	FBgn0184645	FBgn0238510
FBgn0001297	FBgn0192899	FBgn0241033
FBgn0052685	FBgn0187681	FBgn0232994
FBgn0265991	FBgn0196883	FBgn0231757
FBgn0035677	FBgn0185630	FBgn0238793
FBgn0037336	FBgn0191102	FBgn0242354
[truncated: 5,358 more rows]

## Sheet: TableS3
Table S3: TPMs of neomorphs and amorphs in Yang et al. 2018 testis data.
						OrgR					w1118
Category	Tissue	Gene	Ch	Start	Stop	GSM2647275	GSM2647276	GSM2647277	GSM2817318	Mean TPM	GSM2647323	GSM2647324	GSM2647325	GSM2817334	Mean TPM
Neomorph	Testis	FBgn0013725	2R	14427336	14432337	1.71504	1.60505	1.86359	2.10812	1.82295	11.2609	9.77128	10.8369	12.4027	11.068
Neomorph	Testis	FBgn0034131	2R	16484841	16485552	0	0	0	0.13268	0.03317	0	0	0	0	0
Neomorph	Testis	FBgn0035315	3L	2197013	2198089	0	0	0	0	0	0	0	0	0	0
Neomorph	Testis	FBgn0036349	3L	13378583	13379190	0	0	0.136483	0.071687	0.0520425	0.175896	0.16031	0	0	0.0840515
Neomorph	Testis	FBgn0036677	3L	16923914	16927434	4.78682	4.59635	4.91882	5.21599	4.87949	5.33645	4.99687	4.89131	5.14574	5.09259
Neomorph	Testis	FBgn0039027	3R	22804291	22807290	0	0	0	0	0	0	0	0	0	0
Neomorph	Testis	FBgn0039039	3R	23021222	23026713	2.2112	2.56632	2.49349	2.48165	2.43817	7.05848	6.76205	7.31494	7.78486	7.23008
Neomorph	Testis	FBgn0039771	3R	30444076	30445046	0	0	0	0	0	0	0	0	0	0
Neomorph	Testis	FBgn0040279	3R	6299128	6300738	1.34705	0.847302	0.849703	1.15342	1.04937	4.5422	4.23025	4.01375	4.43436	4.30514
Neomorph	Testis	FBgn0040318	3L	14583222	14599540	2.87714	2.96354	2.47395	2.18895	2.62589	12.2346	12.6736	12.883	12.5326	12.581
Neomorph	Testis	FBgn0052774	X	4244095	4246139	28.4565	27.9978	32.0736	33.3624	30.4726	29.1428	32.1414	34.2515	31.0636	31.6498
Neomorph	Testis	FBgn0053349	2R	6950385	6952158	0	0	0	0	0	0	0	0	0	0
Neomorph	Testis	FBgn0263020	2R	12241218	12241872	4.59696	3.89756	5.05623	5.17926	4.6825	2.03572	1.78929	1.76476	2.05593	1.91142
Neomorph	Testis	FBgn0263320	2L	1428474	1429159	46.8837	48.7084	46.5681	44.8011	46.7403	4.88268	4.45004	4.39279	4.7452	4.61768
Neomorph	Testis	FBgn0264362	2L	18804491	18805347	1.27408	2.08828	2.4925	1.66423	1.87978	2.99063	0	2.21249	3.44299	2.16153
Neomorph	Testis	FBgn0264829	3R	12258737	12262879	20.5465	17.8566	18.5694	20.0904	19.2657	10.8971	12.4763	12.8168	11.5307	11.9302
Neomorph	Testis	FBgn0265158	3R	8684793	8685176	13.0487	11.6201	10.7968	11.2877	11.6883	55.6014	60.9392	67.0855	62.618	61.561
Amorph	Testis	FBgn0002856	2L	5892298	5892862	0	0	0	0	0	0	0	0	0	0		0
Amorph	Testis	FBgn0011276	X	2680199	2681723	0.186366	0.118319	0	0	0.0761712	0	0	0	0	0		0.0761712
Amorph	Testis	FBgn0015351	3R	16649981	16651157	4.87345	3.97336	3.49322	4.29074	4.15769	6.50332	5.48322	6.47422	7.91236	6.59328		-2.43559
Amorph	Testis	FBgn0020617	2R	20916753	20937030	0.198536	0.253293	0.142106	0	0.148484	0.45657	0.632887	0.725949	0.568845	0.596063		-0.447579
Amorph	Testis	FBgn0030006	X	8142550	8143835	18.9891	18.6898	17.4961	18.6057	18.4452	16.8249	15.0695	14.9403	17.2167	16.0128		2.43234
Amorph	Testis	FBgn0030643	X	15467891	15468303	0.512511	0.32538	0.176601	0.463794	0.369572	0	0.239149	0.235871	0	0.118755		0.250817
Amorph	Testis	FBgn0030664	X	15662585	15663319	0	0	0	0	0	0	0	0	0	0		0
Amorph	Testis	FBgn0031617	2L	4642972	4646562	0.266349	0.169098	0	0	0.108862	0	0	0	0	0		0.108862
Amorph	Testis	FBgn0032094	2L	9077121	9077988	14.9693	15.3894	14.238	14.3704	14.7418	30.4194	30.4834	28.549	27.8995	29.3378		-14.596
Amorph	Testis	FBgn0032533	2L	13812700	13813256	0	0	0	0	0	0	0	0	0	0		0
Amorph	Testis	FBgn0033145	2R	7149174	7149677	0.401287	0.254767	0	0	0.164014	0	0	0	0	0		0.164014
Amorph	Testis	FBgn0033167	2R	7408371	7409385	0	0	0	0	0	0	0	0	0	0		0
Amorph	Testis	FBgn0033582	2R	11217416	11219771	0.225237	0.190664	0	0	0.103975	0.249226	0.586426	0	0.210695	0.261587		-0.157612
Amorph	Testis	FBgn0034364	2R	18616692	18619328	0	0	0	0	0	0	0	0	0	0		0
Amorph	Testis	FBgn0035176	3L	902898	903810	0	0	0	0	0	0	0	0	0	0		0
Amorph	Testis	FBgn0035343	3L	2474667	2475614	0	0	0.073038	0.098499	0.0428842	0	0	0	0	0		0.0428842
Amorph	Testis	FBgn0035583	3L	4898900	4900869	0	0.875738	1.45432	1.14699	0.869262	1.10604	1.73024	1.56933	1.54296	1.48714		-0.617881
Amorph	Testis	FBgn0036382	3L	13878994	13883056	0	0	0	0	0	1.01186	0	0	0.78816	0.450006		-0.450006
Amorph	Testis	FBgn0037612	3R	8712933	8715263	0.16469	1.38839	0.384653	0.740292	0.669506	0.144032	0.141049	0.768714	0.145336	0.299783		0.369723
Amorph	Testis	FBgn0039452	3R	26728727	26729341	0	0	0	0	0	0	0	0	0	0		0
Amorph	Testis	FBgn0039597	3R	28755484	28756979	0.091334	0.057985	0.032226	0.084632	0.0665442	0	0	0	0	0		0.0665442
Amorph	Testis	FBgn0039598	3R	28756999	28758234	0.51075	0.372584	0.080565	0.141053	0.276238	0	0	0	0	0		0.276238
Amorph	Testis	FBgn0039599	3R	28790522	28791461	0	0	0	0	0	0	0	0	0	0		0
Amorph	Testis	FBgn0039679	3R	29672456	29674223	5.23539	5.64309	5.10141	4.16336	5.03581	0.107002	0.414767	0.445042	0.272378	0.309797		4.72602
Amorph	Testis	FBgn0040759	2R	12163675	12164896	0.427999	0.42761	0.237646	0.158638	0.312973	0.393137	0.53568	0.440865	0.287251	0.414233		-0.10126
Amorph	Testis	FBgn0040907	X	4321764	4322231	7.95892	7.67394	8.11044	7.48665	7.80749	6.09597	8.06563	8.45458	7.06188	7.41951		0.387976
Amorph	Testis	FBgn0052220	3L	19988027	19988947	1.29272	1.71463	1.77711	1.25994	1.5111	0.762233	1.28915	0.962356	0.441888	0.863908		0.647192
Amorph	Testis	FBgn0052656	X	12059795	12065144	0	0	0	0	0	0	0	0	0	0		0
Amorph	Testis	FBgn0053276	3L	7639811	7640446	0	0.892382	0	0	0.223096	0	0	0	1.88037	0.470093		-0.246997
Amorph	Testis	FBgn0054041	3R	30508023	30510146	0	0	0	0.104023	0.0260058	0	0	0	0	0		0.0260058
Amorph	Testis	FBgn0054051	2L	19960069	19961030	0	0	0	0	0	0	0	0	0	0		0
Amorph	Testis	FBgn0085328	3R	30249583	30250661	0	0	0	0	0	0	0	0	0	0		0
Amorph	Testis	FBgn0250831	3R	25806445	25806961	0	0	0	0	0	0	0	0	0	0		0
Amorph	Testis	FBgn0250837	2L	11011312	11012135	7.5424	10.7257	8.35659	0	6.65618	7.86138	17.4983	19.2327	6.25771	12.7125		-6.05633
Amorph	Testis	FBgn0259959	2L	5884350	5884774	0	0	0	0	0	0	0	0	0	0		0
Amorph	Testis	FBgn0259961	2L	11753640	11754022	0	0	0	0	0	0	0	0	0	0		0
Amorph	Testis	FBgn0259962	2L	11754085	11754502	0	0	0	0	0	0	0	0	0	0		0
Amorph	Testis	FBgn0259965	2L	15201613	15202092	0	0	0	0	0	0	0	0	0	0		0
Amorph	Testis	FBgn0259967	2R	16744295	16745114	0	0	0	0	0	0	0	0	0	0		0
Amorph	Testis	FBgn0260027	3L	18667361	18668135	2.13585	1.82766	2.04549	2.52373	2.13318	2.97682	3.10822	3.32009	3.25958	3.16618		-1.03299
Amorph	Testis	FBgn0260964	2R	13513132	13534251	0.051714	0.068669	0.048236	0.044874	0.0533732	0.04542	0.042361	0.018899	0.014365	0.0302612		0.023112
Amorph	Testis	FBgn0261568	2L	14842358	14843108	0	0	0	0	0	0	0	0	0	0		0
Amorph	Testis	FBgn0261860	3R	26783609	26784208	0.583104	0.370198	0	0	0.238325	0	0	0	0	0		0.238325
Amorph	Testis	FBgn0262359	2L	8243323	8244003	0	0	0	0	0	0.29482	0.41735	0	0	0.178042		-0.178042
Amorph	Testis	FBgn0262365	3R	13086224	13086761	0	0	0	0	0	0	0	0	0	0		0
Amorph	Testis	FBgn0262547	2R	15013047	15013522	0	0	0	0	0	0	0	0	0	0		0
Amorph	Testis	FBgn0262621	2L	3701826	3702248	0	0	0	0	0	0	0	0	0	0		0
Amorph	Testis	FBgn0262961	2R	17255241	17255737	0	0	0	0	0	0	0	0	0	0		0
Amorph	Testis	FBgn0263082	2L	9349546	9349963	0	0	0	0	0	0	0	0	0	0		0
Amorph	Testis	FBgn0264725	3L	12032557	12032999	0	0	0	0	0	0	0	0	0	0		0
Amorph	Testis	FBgn0264988	2L	2424797	2425041	0	0.240569	0.133697	0	0.0935665	0	0	0	0	0		0.0935665
										32					34		24

## Sheet: Table S4
Table S4: FPKM in Neomorphs and Amorphs in FlyAtlas2
Gene	Category	Tissue	FlyAtlas2 Tissue	FPKM
FBgn0000351	Neomorph	AG	acc_gland_am	1.78
FBgn0000355	Neomorph	AG	acc_gland_am	0.32
FBgn0011694	Neomorph	AG	acc_gland_am	637.51
FBgn0023181	Neomorph	AG	acc_gland_am	2.25
FBgn0028853	Neomorph	AG	acc_gland_am	0.06
FBgn0030202	Neomorph	AG	acc_gland_am	1.16
FBgn0032473	Neomorph	AG	acc_gland_am	2.07
FBgn0032788	Neomorph	AG	acc_gland_am	5.61
FBgn0032891	Neomorph	AG	acc_gland_am	1.91
FBgn0033354	Neomorph	AG	acc_gland_am	11.56
FBgn0033500	Neomorph	AG	acc_gland_am	1.63
FBgn0033594	Neomorph	AG	acc_gland_am	0
FBgn0034935	Neomorph	AG	acc_gland_am	1.13
FBgn0035733	Neomorph	AG	acc_gland_am	0.32
FBgn0038009	Neomorph	AG	acc_gland_am	1.37
FBgn0038143	Neomorph	AG	acc_gland_am	0.11
FBgn0038693	Neomorph	AG	acc_gland_am	1.56
FBgn0039795	Neomorph	AG	acc_gland_am	0.01
FBgn0039820	Neomorph	AG	acc_gland_am	0.16
FBgn0039972	Neomorph	AG	acc_gland_am	17.14
FBgn0040730	Neomorph	AG	acc_gland_am	0.06
FBgn0050413	Neomorph	AG	acc_gland_am	0
FBgn0051446	Neomorph	AG	acc_gland_am	1.04
FBgn0051760	Neomorph	AG	acc_gland_am	8.69
FBgn0052816	Neomorph	AG	acc_gland_am	10.28
FBgn0053696	Neomorph	AG	acc_gland_am	0.24
FBgn0054026	Neomorph	AG	acc_gland_am	0.16
FBgn0085273	Neomorph	AG	acc_gland_am	1.03
FBgn0086916	Neomorph	AG	acc_gland_am	0.22
FBgn0262362	Neomorph	AG	acc_gland_am	0.03
FBgn0263763	Neomorph	AG	acc_gland_am	0
FBgn0000356	Neomorph	Head	head_af	0.48
FBgn0000358	Neomorph	Head	head_af	0.63
FBgn0000359	Neomorph	Head	head_af	0.37
FBgn0000360	Neomorph	Head	head_af	0.26
FBgn0003015	Neomorph	Head	head_af	0.16
FBgn0014465	Neomorph	Head	head_af	0.5
FBgn0014466	Neomorph	Head	head_af	0.14
FBgn0030313	Neomorph	Head	head_af	0.08
FBgn0030544	Neomorph	Head	head_af	0.04
FBgn0031109	Neomorph	Head	head_af	46.03
FBgn0031292	Neomorph	Head	head_af	0.06
FBgn0034766	Neomorph	Head	head_af	15.1
FBgn0034957	Neomorph	Head	head_af	0.04
FBgn0037488	Neomorph	Head	head_af	0.07
FBgn0038132	Neomorph	Head	head_af	0.75
FBgn0040684	Neomorph	Head	head_af	0.03
FBgn0050395	Neomorph	Head	head_af	0.05
FBgn0051157	Neomorph	Head	head_af	0.12
FBgn0261567	Neomorph	Head	head_af	0.87
FBgn0263707	Neomorph	Head	head_af	0
FBgn0264714	Neomorph	Head	head_af	0
FBgn0030103	Neomorph	1st Instar	whole_body_larval	0
FBgn0034515	Neomorph	1st Instar	whole_body_larval	0
FBgn0037405	Neomorph	1st Instar	whole_body_larval	0.13
FBgn0038508	Neomorph	1st Instar	whole_body_larval	7.54
FBgn0030187	Neomorph	SG	salv_gland_larval	0.4
FBgn0032024	Neomorph	SG	salv_gland_larval	0
FBgn0032663	Neomorph	SG	salv_gland_larval	0
FBgn0035325	Neomorph	SG	salv_gland_larval	0.02
FBgn0036094	Neomorph	SG	salv_gland_larval	0.23
FBgn0036228	Neomorph	SG	salv_gland_larval	0
FBgn0036881	Neomorph	SG	salv_gland_larval	0.01
FBgn0037563	Neomorph	SG	salv_gland_larval	0.05
FBgn0038470	Neomorph	SG	salv_gland_larval	8.59
FBgn0039002	Neomorph	SG	salv_gland_larval	0
FBgn0052304	Neomorph	SG	salv_gland_larval	0
FBgn0054045	Neomorph	SG	salv_gland_larval	0
FBgn0013725	Neomorph	Testis	testis_am	1.91
FBgn0034131	Neomorph	Testis	testis_am	0.08
FBgn0035315	Neomorph	Testis	testis_am	0.03
FBgn0036349	Neomorph	Testis	testis_am	1.54
FBgn0036677	Neomorph	Testis	testis_am	1.19
FBgn0039027	Neomorph	Testis	testis_am	0
FBgn0039039	Neomorph	Testis	testis_am	1.29
FBgn0039771	Neomorph	Testis	testis_am	0.06
FBgn0040279	Neomorph	Testis	testis_am	0.41
FBgn0040318	Neomorph	Testis	testis_am	1.72
FBgn0052774	Neomorph	Testis	testis_am	0.92
FBgn0053349	Neomorph	Testis	testis_am	0.24
FBgn0263020	Neomorph	Testis	testis_am	1.49
FBgn0263320	Neomorph	Testis	testis_am	97.43
FBgn0264362	Neomorph	Testis	testis_am	2.62
FBgn0264829	Neomorph	Testis	testis_am	17.28
FBgn0265158	Neomorph	Testis	testis_am	159.64
FBgn0010388	Amorph	AG	acc_gland_am	0
FBgn0014865	Amorph	AG	acc_gland_am	0.24
FBgn0032360	Amorph	AG	acc_gland_am	1.85
FBgn0032582	Amorph	AG	acc_gland_am	0.34
FBgn0032797	Amorph	AG	acc_gland_am	0.04
FBgn0033888	Amorph	AG	acc_gland_am	0.91
FBgn0033970	Amorph	AG	acc_gland_am	0.15
FBgn0034253	Amorph	AG	acc_gland_am	0.43
FBgn0034416	Amorph	AG	acc_gland_am	1.17
FBgn0034647	Amorph	AG	acc_gland_am	0.5
FBgn0035104	Amorph	AG	acc_gland_am	0.23
FBgn0036343	Amorph	AG	acc_gland_am	0
FBgn0037683	Amorph	AG	acc_gland_am	0.54
FBgn0038353	Amorph	AG	acc_gland_am	7.42
FBgn0039045	Amorph	AG	acc_gland_am	1.12
FBgn0039864	Amorph	AG	acc_gland_am	20.44
FBgn0040837	Amorph	AG	acc_gland_am	0.52
FBgn0050259	Amorph	AG	acc_gland_am	0.87
FBgn0051157	Amorph	AG	acc_gland_am	4.06
FBgn0085422	Amorph	AG	acc_gland_am	0.06
FBgn0260396	Amorph	AG	acc_gland_am	0.96
FBgn0262858	Amorph	AG	acc_gland_am	0.94
FBgn0003655	Amorph	Head	head_af	0.11
FBgn0030014	Amorph	Head	head_af	0.1
FBgn0033458	Amorph	Head	head_af	1.14
FBgn0037322	Amorph	Head	head_af	0.39
FBgn0051133	Amorph	Head	head_af	1.97
FBgn0052391	Amorph	Head	head_af	1.28
FBgn0032824	Amorph	1st Instar	whole_body_larval	63.76
FBgn0040687	Amorph	1st Instar	whole_body_larval	1
FBgn0262679	Amorph	1st Instar	whole_body_larval	0.12
FBgn0001254	Amorph	SG	salv_gland_larval	1.26
FBgn0002856	Amorph	Testis	testis_am	82.47
FBgn0011276	Amorph	Testis	testis_am	0.03
FBgn0015351	Amorph	Testis	testis_am	3.23
FBgn0020617	Amorph	Testis	testis_am	0.34
FBgn0030006	Amorph	Testis	testis_am	6.89
FBgn0030643	Amorph	Testis	testis_am	6.06
FBgn0030664	Amorph	Testis	testis_am	18.04
FBgn0031617	Amorph	Testis	testis_am	7.14
FBgn0032094	Amorph	Testis	testis_am	8.99
FBgn0032533	Amorph	Testis	testis_am	85.23
FBgn0033145	Amorph	Testis	testis_am	15.87
FBgn0033167	Amorph	Testis	testis_am	16.02
FBgn0033582	Amorph	Testis	testis_am	0.31
FBgn0034364	Amorph	Testis	testis_am	30.29
FBgn0035176	Amorph	Testis	testis_am	0.29
FBgn0035343	Amorph	Testis	testis_am	1.23
FBgn0035583	Amorph	Testis	testis_am	2.35
FBgn0036382	Amorph	Testis	testis_am	0.68
FBgn0037612	Amorph	Testis	testis_am	2.5
FBgn0039452	Amorph	Testis	testis_am	8.67
FBgn0039597	Amorph	Testis	testis_am	9.67
FBgn0039598	Amorph	Testis	testis_am	11.12
FBgn0039599	Amorph	Testis	testis_am	2.97
FBgn0039679	Amorph	Testis	testis_am	0.37
FBgn0040759	Amorph	Testis	testis_am	0.3
FBgn0040907	Amorph	Testis	testis_am	21.74
FBgn0052220	Amorph	Testis	testis_am	0.64
FBgn0052656	Amorph	Testis	testis_am	2.73
FBgn0053276	Amorph	Testis	testis_am	3.63
FBgn0054041	Amorph	Testis	testis_am	7.24
FBgn0054051	Amorph	Testis	testis_am	26.58
FBgn0085328	Amorph	Testis	testis_am	16.25
FBgn0250831	Amorph	Testis	testis_am	113.65
FBgn0250837	Amorph	Testis	testis_am	18.52
FBgn0259959	Amorph	Testis	testis_am	53.98
FBgn0259961	Amorph	Testis	testis_am	31.19
FBgn0259962	Amorph	Testis	testis_am	29.24
FBgn0259965	Amorph	Testis	testis_am	164.35
FBgn0259967	Amorph	Testis	testis_am	15.24
FBgn0260027	Amorph	Testis	testis_am	1.44
FBgn0260964	Amorph	Testis	testis_am	0.74
FBgn0261568	Amorph	Testis	testis_am	4.33
FBgn0261860	Amorph	Testis	testis_am	28.14
FBgn0262359	Amorph	Testis	testis_am	17.62
FBgn0262365	Amorph	Testis	testis_am	10.36
FBgn0262547	Amorph	Testis	testis_am	186.87
FBgn0262621	Amorph	Testis	testis_am	25.27
FBgn0262961	Amorph	Testis	testis_am	51.35
FBgn0263082	Amorph	Testis	testis_am	24.58
FBgn0264725	Amorph	Testis	testis_am	11.42
FBgn0264988	Amorph	Testis	testis_am	14.78

## Sheet: Table S5
	Table S5: Parent specific read-pair counts for ASE analysis.
	Tissue	Parent 1	Parent 1 Reads	Parent 2	Parent 2 Reads	Percent P1 Reads
	AG	RAL-307	2265383	RAL-304	7185023	0.239713
	AG	RAL-357	6097848	RAL-399	6351985	0.489794
	AG	RAL-360	4259582	RAL-517	4343027	0.49515
	Testis	RAL-307	5235936	RAL-304	5370120	0.493674
	Testis	RAL-357	5734914	RAL-399	5726094	0.500385
	Testis	RAL-360	5897617	RAL-517	5912594	0.499366

## Sheet: Table S6
	Table S6: TPMs in all 1:1:1 Orthologs
		D.melanogaster
		Parents		F1s		D. simulans		D. yakuba
		Mean	Median	Mean	Median	Mean	Median	Mean	Median
	AG	59	2.88	61.4	2.1	63.01	3.12	60.21	2.24
	Head	59.587	14.36	59.88	15.181	59.533	14.308	63.053	15.636
	1st Instar Larvae	68.532	12.174	69.758	11.206	71.961	12.288	73.709	12.232
	SG	37.069	2.071	39.734	2.015	34.626	1.982	37.09	1.1
	Testis	66.893	11.353	70.57	9.95	74.47	10.82	71.54	9.37

## Sheet: Table S7
Table S7: Number of genes expressed in each tissue.
Expressed In Group Only	D. melanogaster	D. simulans	D. yakuba
AG	31	16	11
Head	133	104	117
Head, AG	11	16	13
1st Instar	172	167	174
1st Instar, AG	29	17	9
1st Instar, Head	462	456	557
1st Instar, Head, AG	68	76	110
SG	24	25	24
SG, AG	2	2	4
SG, Head	10	6	5
SG, Head, AG	2	1	2
SG, 1st Instar	28	18	21
SG, 1st Instar, AG	4	5	3
SG, 1st Instar, Head	78	68	76
SG, 1st Instar, Head, AG	39	41	51
Testis	941	857	848
Testis, AG	106	124	110
Testis, Head	105	70	103
Testis, Head, AG	30	31	33
Testis, 1st Instar	80	71	109
Testis, 1st Instar, AG	17	32	7
Testis, 1st Instar, Head	517	481	692
Testis, 1st Instar, Head, AG	405	463	796
Testis, SG	12	8	6
Testis, SG, AG	2	5	2
Testis, SG, Head	7	5	6
Testis, SG, Head, AG	10	8	6
Testis, SG, 1st Instar	13	13	19
Testis, SG, 1st Instar, AG	7	10	8
Testis, SG, 1st Instar, Head	184	168	141
Testis, SG, 1st Instar, Head, AG	3277	3274	2610
Total	6806	6638	6673
All Expressed in Tissue	D. melanogaster	D. simulans	D. yakuba
AG	4040	4121	3775
Head	5338	5268	5318
1st Instar	5380	5360	5383
SG	3699	3657	2984
Testis	5713	5620	5496

## Sheet: Table S8
Table S8: R2 comparing Mean TPMs in D. melanogater vs. D. simulans
		D. melanogaster to D. simulans Mean Expression
		<=99%	0 < 95%	95 >= < 99%
	AG	0.7923	0.6992	0.5044
	Head	0.8964	0.8611	0.6776
	1st Instar	0.9104	0.8804	0.6756
	SG	0.8201	0.7437	0.5236
	Testis	0.8099	0.7628	0.2622

## Sheet: Table S9
Table S9: Regulatory mechanisms for neomorphs and amorphs.
Category	Tissue	Cross	Gene	Ch	Start	Stop	P1	P2	P1_TPM	P2_TPM	Cross_TPM	P1sep_count	P2sep_count	Binomial	Regulatory
Gain	AG	357x399	FBgn0032788	2L	19484930	19486532	357	399	4.67483	0.544859	2.19286	37	18	0.00688936	Ambiguous
Gain	AG	357x399	FBgn0011694	2R	25173568	25174230	357	399	0	1219.41	3.66539	24	13	0.0692981	Trans
Gain	AG	357x399	FBgn0035733	3L	7058930	7077462	357	399	3.01508	0.042626	2.07044	94	44	7.54399e-06	Cis+Trans
Gain	AG	357x399	FBgn0000355	3L	8728481	8729066	357	399	7.75267	0	5.40584	79	2	4.51592e-22	Cis+Trans
Gain	AG	357x399	FBgn0023181	2R	24795740	24797414	357	399	2.95432	2.25334	2.01006	18	33	0.0675916	Trans
Gain	AG	357x399	FBgn0039972	2L	22308755	22368796	357	399	11.5142	16.0009	8.19012	226	385	2.92747e-09	Cis-Trans
Gain	AG	357x399	FBgn0038693	3R	19230764	19246130	357	399	10.6729	0.122332	0.582798	98	19	9.59465e-15	Cis-Trans
Gain	AG	357x399	FBgn0033354	2R	8934576	8939789	357	399	4.6652	2.39659	2.98813	25	53	0.00303415	Ambiguous
Gain	AG	357x399	FBgn0032473	2L	13160527	13163153	357	399	0.316462	2.01368	1.2141	15	65	3.00268e-08	Cis
Gain	AG	357x399	FBgn0032891	2L	20832849	20835840	357	399	2.85532	4.13967	0.496682	9	18	0.124089	Trans
Gain	AG	360x517	FBgn0033594	2R	11244247	11245199	360	517	4.21427	0	1.0239	24	1	6.5263e-07	Cis-Trans
Gain	AG	360x517	FBgn0035733	3L	7058930	7077462	360	517	0.018459	5.22881	0.981151	10	38	6.40923e-05	Cis-Trans
Gain	AG	360x517	FBgn0085273	3L	14235053	14235941	360	517	0	4.62514	3.64463	14	38	0.00122956	Trans
Gain	AG	360x517	FBgn0086916	3L	13174478	13176781	360	517	2.45409	0.821739	1.07423	61	36	0.0107531	Trans
Gain	AG	360x517	FBgn0034935	2R	23946959	23949076	360	517	0.478729	0.751466	5.05072	37	26	0.165708	Trans
Gain	AG	360x517	FBgn0050413	2R	23329543	23330068	360	517	10.5445	0.107589	1.66696	25	0	2.31809e-08	Cis-Trans
Gain	AG	360x517	FBgn0051760	2L	12142780	12170508	360	517	2.81589	0.022009	0.703674	103	7	1.46268e-23	Cis-Trans
Gain	AG	360x517	FBgn0053696	3L	9644109	9659433	360	517	2.61059	0.810275	1.75929	96	26	3.96511e-11	Cis
Gain	AG	360x517	FBgn0033354	2R	8934576	8939789	360	517	2.02695	1.46662	1.11174	26	15	0.0858911	Trans
Gain	AG	360x517	FBgn0262362	3R	8041224	8055970	360	517	2.05415	0.127803	0.723219	79	14074	4.940656e-324	Cis*Trans
Gain	AG	360x517	FBgn0032473	2L	13160527	13163153	360	517	3.13032	0.462057	2.02375	117	21	5.43813e-18	Cis
Gain	Testis	307x304	FBgn0263320	2L	1428474	1429159	307	304	32.4941	0.962486	24.8095	138	4	1.54194e-35	Cis+Trans
Gain	Testis	307x304	FBgn0013725	2R	14427336	14432337	307	304	0.045068	19.0521	9.50183	1	294	1.35248e-88	Cis
Gain	Testis	307x304	FBgn0039771	3R	30444076	30445046	307	304	6.51342	1.53326	4.80992	32	83	8.5073e-07	Ambiguous
Gain	Testis	307x304	FBgn0036677	3L	16923914	16927434	307	304	1.34898	1.43859	2.14214	32	75	1.69783e-05	Ambiguous
Gain	Testis	307x304	FBgn0265158	3R	8684793	8685176	307	304	69.9232	67.5117	74.8569	427	124	1.50277e-38	Compensatory
Gain	Testis	307x304	FBgn0040318	3L	14583222	14599540	307	304	10.7533	5.51603	7.96302	3	13	0.0117915	Ambiguous
Gain	Testis	307x304	FBgn0035315	3L	2197013	2198089	307	304	7.89995	0	6.18642	14	0	0.000123672	Cis+Trans
Gain	Testis	307x304	FBgn0264362	2L	18804491	18805347	307	304	2.5142	6.95891	3.98998	7	9	0.625251	Ambiguous
Gain	Testis	307x304	FBgn0039039	3R	23021222	23026713	307	304	5.06148	3.06129	6.2172	40	43	0.66273	Trans
Gain	Testis	307x304	FBgn0263020	2R	12241218	12241872	307	304	0	2.96716	1.36747	0	24	4.46115e-08	Cis
Gain	Testis	307x304	FBgn0039027	3R	22804291	22807290	307	304	0.047915	6.53354	4.63898	0	158	4.0631e-49	Cis+Trans
Gain	Testis	357x399	FBgn0263320	2L	1428474	1429159	357	399	0.425961	87.7553	44.5441	30	187	6.45061e-29	Cis
Gain	Testis	357x399	FBgn0013725	2R	14427336	14432337	357	399	0	7.14611	5.03141	0	187	1.01958e-56	Cis+Trans
Gain	Testis	357x399	FBgn0265158	3R	8684793	8685176	357	399	75.2953	141.001	72.5372	41	29	0.188216	Trans
Gain	Testis	357x399	FBgn0040318	3L	14583222	14599540	357	399	3.3646	6.19618	6.15157	22	234	6.4119e-46	Cis+Trans
Gain	Testis	357x399	FBgn0035315	3L	2197013	2198089	357	399	0	1.49306	2.13481	2	48	2.26663e-12	Cis+Trans
Gain	Testis	357x399	FBgn0039039	3R	23021222	23026713	357	399	6.08122	5.92838	8.14233	88	103	0.311054	Ambiguous
Gain	Testis	357x399	FBgn0039027	3R	22804291	22807290	357	399	5.19958	0	1.18867	89	1	1.47018e-25	Cis-Trans
Gain	Testis	360x517	FBgn0263320	2L	1428474	1429159	360	517	0.373288	105.507	59.7616	13	208	2.28969e-46	Cis
Gain	Testis	360x517	FBgn0013725	2R	14427336	14432337	360	517	0.046416	23.504	15.7862	0	221	6.52106e-67	Cis+Trans
Gain	Testis	360x517	FBgn0039771	3R	30444076	30445046	360	517	0	3.09765	1.29369	0	32	4.66585e-10	Cis
Gain	Testis	360x517	FBgn0036677	3L	16923914	16927434	360	517	0.664203	2.42784	2.01813	40	63	0.0297157	Trans
Gain	Testis	360x517	FBgn0265158	3R	8684793	8685176	360	517	94.7308	54.1104	81.2575	631	259	6.17187e-37	Cis
Gain	Testis	360x517	FBgn0040318	3L	14583222	14599540	360	517	0.79784	13.2461	6.98492	27	37	0.260497	Ambiguous
Gain	Testis	360x517	FBgn0035315	3L	2197013	2198089	360	517	9.0333	0	5.55208	119	0	1.18567e-36	Cis
Gain	Testis	360x517	FBgn0040279	3R	6299128	6300738	360	517	6.17422	0	2.29611	13	0	0.000118934	Cis-Trans
Gain	Testis	360x517	FBgn0036349	3L	13378583	13379190	360	517	2.06435	1.00376	0.906822	6	19	0.0146381	Trans
Gain	Testis	360x517	FBgn0264362	2L	18804491	18805347	360	517	1.66685	4.23812	3.62761	13	6	0.114607	Ambiguous
Gain	Testis	360x517	FBgn0039039	3R	23021222	23026713	360	517	9.07021	4.78811	8.90794	119	63	2.94105e-05	Cis+Trans
Loss	AG	357x399	FBgn0260396	3L	10623066	10623576	357	399	0.190309	3.00086	1.16473	14	10	0.417185	Trans
Loss	AG	357x399	FBgn0032582	2L	16292010	16293025	357	399	0.428421	2.31415	0.716223	9	21	0.0440066	Trans
Loss	AG	357x399	FBgn0038353	3R	15695241	15697142	357	399	1.3213	7.47591	0.287753	4	8	0.388855	Trans
Loss	AG	357x399	FBgn0032360	2L	11342301	11343318	357	399	0	1.81435	4.82489	31	46	0.138654	Trans
Loss	AG	357x399	FBgn0085422	2L	3175112	3200496	357	399	4.94036	0.245482	2.52218	369	135	2.25251e-28	Cis
Loss	AG	357x399	FBgn0034416	2R	19059421	19061065	357	399	0.070494	0.247825	2.08663	58	51	0.39007	Trans
Loss	AG	357x399	FBgn0262858	3R	24634625	24635165	357	399	0.261275	0.417473	2.87901	11	15	0.559265	Trans
Loss	AG	357x399	FBgn0039864	3R	31678147	31679880	357	399	18.3724	3.45914	11.6306	172	132	0.00830915	Ambiguous
Loss	AG	360x517	FBgn0038353	3R	15695241	15697142	360	517	24.7141	0.043882	31.1749	18	0	3.18342e-06	Cis+Trans
Loss	AG	360x517	FBgn0032360	2L	11342301	11343318	360	517	0.551587	7.39327	3.52592	9	22	0.0296973	Ambiguous
Loss	AG	360x517	FBgn0262858	3R	24634625	24635165	360	517	0.430721	2.49274	1.47095	8	11	0.647923	Ambiguous
Loss	AG	360x517	FBgn0034647	2R	21660967	21662995	360	517	6.02172	0.974516	1.37977	17	19	0.868177	Trans
Loss	AG	360x517	FBgn0039864	3R	31678147	31679880	360	517	2.7922	0	1.00455	25	1	3.3514e-07	Cis-Trans
Loss	Testis	307x304	FBgn0002856	2L	5892298	5892862	307	304	62.1376	62.0175	130.161	814	723	0.0662437	Ambiguous
Loss	Testis	307x304	FBgn0259959	2L	5884350	5884774	307	304	19.6017	17.6883	31.9894	146	134	0.632723	Ambiguous
Loss	Testis	307x304	FBgn0039452	3R	26728727	26729341	307	304	0	4.40764	35.6178	229	255	0.158723	Trans
Loss	Testis	307x304	FBgn0035583	3L	4898900	4900869	307	304	3.41013	0.840923	2.67726	20	19	1	Trans
Loss	Testis	307x304	FBgn0259962	2L	11754085	11754502	307	304	6.26673	12.6182	16.1285	71	84	0.260725	Trans
Loss	Testis	307x304	FBgn0259967	2R	16744295	16745114	307	304	11.3347	10.015	15.2769	48	35	0.227034	Ambiguous
Loss	Testis	307x304	FBgn0033167	2R	7408371	7409385	307	304	10.0073	18.5781	10.0694	17	15	0.860372	Trans
Loss	Testis	307x304	FBgn0261860	3R	26783609	26784208	307	304	37.1821	54.3354	87.7047	496	384	0.00065477	Trans
Loss	Testis	307x304	FBgn0036382	3L	13878994	13883056	307	304	2.71264	3.46004	1.97262	8	8	1	Trans
Loss	Testis	307x304	FBgn0250831	3R	25806445	25806961	307	304	42.8659	24.8173	23.7901	203	63	8.73483e-18	Cis-Trans
Loss	Testis	307x304	FBgn0261568	2L	14842358	14843108	307	304	5.73534	5.55268	9.4076	13	16	0.580886	Ambiguous
Loss	Testis	307x304	FBgn0262961	2R	17255241	17255737	307	304	56.3485	34.2922	55.9107	457	210	8.41775e-21	Cis
Loss	Testis	307x304	FBgn0264725	3L	12032557	12032999	307	304	4.77768	5.84932	19.5982	50	27	0.0121337	Ambiguous
Loss	Testis	307x304	FBgn0054051	2L	19960069	19961030	307	304	28.6402	33.5817	33.8426	231	253	0.219663	Conserved
Loss	Testis	307x304	FBgn0054041	3R	30508023	30510146	307	304	4.95764	5.29938	6.39967	91	99	0.468811	Conserved
Loss	Testis	307x304	FBgn0032094	2L	9077121	9077988	307	304	16.2064	23.2151	20.016	203	287	5.54754e-05	Cis
Loss	Testis	307x304	FBgn0264988	2L	2424797	2425041	307	304	2.98802	2.1427	2.10032	8	12	0.378207	Ambiguous
Loss	Testis	307x304	FBgn0259965	2L	15201613	15202092	307	304	32.1444	42.3167	59.6785	232	199	0.193339	Trans
Loss	Testis	307x304	FBgn0053276	3L	7639811	7640446	307	304	3.38796	3.73312	2.21201	15	7	0.134415	Ambiguous
Loss	Testis	307x304	FBgn0262365	3R	13086224	13086761	307	304	6.29479	8.37689	14.9312	89	82	0.75978	Trans
Loss	Testis	357x399	FBgn0263082	2L	9349546	9349963	357	399	35.5819	1.59376	25.2292	7	5	0.774414	Trans
Loss	Testis	357x399	FBgn0002856	2L	5892298	5892862	357	399	76.0709	53.7498	74.4358	303	251	0.0301595	Ambiguous
Loss	Testis	357x399	FBgn0259959	2L	5884350	5884774	357	399	14.3681	11.1543	28.9114	111	125	0.397474	Trans
Loss	Testis	357x399	FBgn0039452	3R	26728727	26729341	357	399	3.90308	17.7261	165.783	1014	1032	0.70705	Trans
Loss	Testis	357x399	FBgn0259962	2L	11754085	11754502	357	399	10.5558	11.8133	10.1534	39	56	0.100173	Conserved
Loss	Testis	357x399	FBgn0039599	3R	28790522	28791461	357	399	8.90924	6.18224	7.79639	62	77	0.234931	Ambiguous
Loss	Testis	357x399	FBgn0033167	2R	7408371	7409385	357	399	20.4949	11.2553	4.81179	17	12	0.458258	Trans
Loss	Testis	357x399	FBgn0261860	3R	26783609	26784208	357	399	26.7383	18.026	41.5424	325	307	0.49893	Trans
Loss	Testis	357x399	FBgn0036382	3L	13878994	13883056	357	399	0	1.46863	2.55415	9	11	0.823803	Trans
Loss	Testis	357x399	FBgn0250831	3R	25806445	25806961	357	399	79.6977	54.4804	21.0713	109	98	0.487117	Trans
Loss	Testis	357x399	FBgn0261568	2L	14842358	14843108	357	399	5.68963	4.135	5.46754	20	7	0.0191573	Ambiguous
Loss	Testis	357x399	FBgn0260027	3L	18667361	18668135	357	399	0	3.95878	2.51193	8	28	0.00119324	Trans
Loss	Testis	357x399	FBgn0262961	2R	17255241	17255737	357	399	49.4099	26.7567	16.4191	69	68	1	Trans
Loss	Testis	357x399	FBgn0264725	3L	12032557	12032999	357	399	3.10685	4.17253	9.19883	10	29	0.00337785	Trans
Loss	Testis	357x399	FBgn0054051	2L	19960069	19961030	357	399	62.6157	49.1474	18.5645	119	140	0.213884	Trans
Loss	Testis	357x399	FBgn0054041	3R	30508023	30510146	357	399	5.56191	13.5757	4.88348	67	90	0.0787918	Trans
Loss	Testis	357x399	FBgn0031617	2L	4642972	4646562	357	399	40.0821	13.8621	12.3952	111	153	0.0114817	Trans
Loss	Testis	357x399	FBgn0032094	2L	9077121	9077988	357	399	22.2257	12.6168	21.4726	151	125	0.132222	Ambiguous
Loss	Testis	357x399	FBgn0259965	2L	15201613	15202092	357	399	52.3338	22.5687	19.0459	54	83	0.0164323	Trans
Loss	Testis	357x399	FBgn0053276	3L	7639811	7640446	357	399	3.53714	0	1.618	8	11	0.647606	Ambiguous
Loss	Testis	357x399	FBgn0085328	3R	30249583	30250661	357	399	12.0395	6.87037	4.73598	27	50	0.0116727	Trans
Loss	Testis	357x399	FBgn0039598	3R	28756999	28758234	357	399	54.3222	35.3436	26.7009	219	279	0.00813256	Trans
Loss	Testis	357x399	FBgn0039597	3R	28755484	28756979	357	399	33.4741	17.4924	23.0303	157	224	0.000701269	Ambiguous
Loss	Testis	357x399	FBgn0262365	3R	13086224	13086761	357	399	4.94393	1.67119	4.43614	32	17	0.0443842	Trans
Loss	Testis	360x517	FBgn0263082	2L	9349546	9349963	360	517	0	11.1798	8.60848	41	58	0.107421	Trans
Loss	Testis	360x517	FBgn0035343	3L	2474667	2475614	360	517	3.01608	0.248458	1.14695	18	11	0.199611	Trans
Loss	Testis	360x517	FBgn0002856	2L	5892298	5892862	360	517	0	32.595	31.8751	157	188	0.106384	Trans
Loss	Testis	360x517	FBgn0259959	2L	5884350	5884774	360	517	0	8.4584	9.03375	40	66	0.0148004	Trans
Loss	Testis	360x517	FBgn0262547	2R	15013047	15013522	360	517	0	4.27388	66.5785	547	334	4.32193e-13	Cis*Trans
Loss	Testis	360x517	FBgn0039452	3R	26728727	26729341	360	517	2.89907	1.43214	5.30657	43	46	0.832287	Trans
Loss	Testis	360x517	FBgn0035583	3L	4898900	4900869	360	517	0.571039	0.193878	3.28759	11	4	0.0762377	Trans
Loss	Testis	360x517	FBgn0259962	2L	11754085	11754502	360	517	0	4.34543	2.98238	4	6	0.753911	Trans
Loss	Testis	360x517	FBgn0039599	3R	28790522	28791461	360	517	0	2.12977	3.11526	19	51	0.000166382	Cis+Trans
Loss	Testis	360x517	FBgn0261860	3R	26783609	26784208	360	517	0	15.8035	12.989	113	151	0.0226659	Trans
Loss	Testis	360x517	FBgn0250831	3R	25806445	25806961	360	517	0	24.7239	6.75618	32	29	0.703003	Trans
Loss	Testis	360x517	FBgn0015351	3R	16649981	16651157	360	517	6.95598	6.24601	6.29434	19	19	1	Conserved
Loss	Testis	360x517	FBgn0260027	3L	18667361	18668135	360	517	0.873381	4.27891	2.16849	10	22	0.050117	Ambiguous
Loss	Testis	360x517	FBgn0262961	2R	17255241	17255737	360	517	0	13.0456	5.82557	30	37	0.463878	Ambiguous
Loss	Testis	360x517	FBgn0262621	2L	3701826	3702248	360	517	0	4.03105	2.97438	12	2	0.00727561	Trans
Loss	Testis	360x517	FBgn0264725	3L	12032557	12032999	360	517	0	2.81904	3.0569	7	7	1	Trans
Loss	Testis	360x517	FBgn0054051	2L	19960069	19961030	360	517	0	10.0378	7.05177	44	58	0.197881	Trans
Loss	Testis	360x517	FBgn0054041	3R	30508023	30510146	360	517	0	2.61951	1.3186	26	25	0.889675	Ambiguous
Loss	Testis	360x517	FBgn0031617	2L	4642972	4646562	360	517	0.019032	4.18801	5.64328	101	198	2.18709e-08	Cis+Trans
Loss	Testis	360x517	FBgn0032094	2L	9077121	9077988	360	517	27.5805	0.075602	16.6626	99	1	6.64414e-29	Cis
Loss	Testis	360x517	FBgn0259965	2L	15201613	15202092	360	517	0	11.4612	6.75807	41	12	5.04651e-05	Ambiguous
Loss	Testis	360x517	FBgn0259961	2L	11753640	11754022	360	517	0	13.3575	11.0851	43	59	0.137179	Trans
Loss	Testis	360x517	FBgn0085328	3R	30249583	30250661	360	517	0	4.46306	1.86485	13	2	0.0041114	Ambiguous
Loss	Testis	360x517	FBgn0039598	3R	28756999	28758234	360	517	0.067621	12.4851	12.2352	125	133	0.663228	Trans
Loss	Testis	360x517	FBgn0039597	3R	28755484	28756979	360	517	0.065953	5.81953	9.37187	80	91	0.444689	Trans

## Sheet: Table S10
Table S10: Neomporphs
Gene	Ch	Fixed	Tissue	D.melanogaster Mean	F1 Mean	D. simulans Mean	D.yakuba Mean	TPM = 0	TPM ≥ 0.1	TPM ≥ 1	TPM ≥ 2	TPM ≥ 4
FBgn0037405	3R	P	1st Instar	2.09987	0.846413	0.063149	0	0	6	3	2	1
FBgn0030103	X	P	1st Instar	0.960349	0.882944	0	0	0	6	1	1	0
FBgn0038508	3R	P	1st Instar	0.812737	0.809691	0.066821	0	0	6	1	1	0
FBgn0034515	2R	P	1st Instar	0.967166	0.264886	0	0	1	5	1	1	0
FBgn0039972	2L	F	AG	14.283	8.68514	0.02195	0.008044	0	6	6	6	6
FBgn0052816	X	F	AG	9.79691	5.40639	0.048741	0	0	6	6	6	6
FBgn0033354	2R	P	AG	2.39287	1.8349	0.012827	0.021614	0	6	6	4	1
FBgn0023181	2R	P	AG	2.31622	2.1709	0	0	0	6	6	4	0
FBgn0032891	2L	P	AG	4.0137	0.486635	0.034711	0	0	6	4	4	3
FBgn0032473	2L	P	AG	1.56646	1.52313	0.058686	0.01477	0	6	4	3	0
FBgn0085273	3L	P	AG	3.27817	2.79579	0.0916	0	2	4	4	2	2
FBgn0000351	2L	P	AG	1.38735	0.773521	0.01778	0	1	5	4	1	0
FBgn0033500	2R	P	AG	3.3142	1.51538	0.030205	0	2	4	3	2	2
FBgn0032788	2L	P	AG	1.32903	1.24343	0	0.045272	0	6	2	1	1
FBgn0038143	3R	P	AG	1.30406	0.479157	0	0	0	6	2	2	0
FBgn0030202	X	P	AG	1.03396	1.02466	0	0	0	6	2	1	0
FBgn0011694	2R	P	AG	407.247	9.79397	0	0.094147	3	3	2	2	1
FBgn0054026	X	P	AG	8.62452	2.36092	0	0	4	2	2	2	1
FBgn0035733	3L	P	AG	4.12194	1.02186	0.08813	0	4	2	2	2	1
FBgn0038693	3R	P	AG	3.09975	0.256883	0.013229	0	2	4	2	1	1
FBgn0051446	3R	P	AG	3.02843	2.49556	0	0	1	5	2	1	1
FBgn0050413	2R	P	AG	2.50504	0.907771	0	0	1	5	2	1	1
FBgn0034935	2R	P	AG	1.80443	2.81695	0	0	1	5	2	1	1
FBgn0086916	3L	P	AG	0.926291	0.491679	0	0.015888	1	5	2	1	0
FBgn0038009	3R	P	AG	4.32636	0.055565	0	0	5	1	1	1	1
FBgn0028853	2L	P	AG	3.06006	0	0	0	5	1	1	1	0
FBgn0051760	2L	P	AG	2.81589	0.363783	0	0	5	1	1	1	0
FBgn0000355	3L	P	AG	2.78783	1.94979	0	0	3	3	1	1	1
FBgn0263763	3L	P	AG	2.26211	0.158055	0	0	5	1	1	1	0
FBgn0033594	2R	P	AG	2.17333	1.0239	0.038442	0.050345	4	2	1	1	1
FBgn0039795	3R	P	AG	1.61636	0.149808	0	0.016852	4	2	1	1	0
FBgn0040730	2R	P	AG	1.12945	0.472391	0.078448	0	3	3	1	1	0
FBgn0053696	3L	P	AG	0.896749	0.818441	0.047192	0.061556	1	5	1	1	0
FBgn0039820	3R	P	AG	0.820652	0.32999	0	0	2	4	1	1	0
FBgn0262362	3R	P	AG	0.725707	0.251563	0	0	2	4	1	1	0
FBgn0031292	2L	F	Head	8.07223	5.30263	0.013937	0	0	6	6	6	6
FBgn0038132	3R	P	Head	3.99365	3.27633	0	0	0	6	6	5	4
FBgn0031109	X	P	Head	5.45597	4.67907	0	0	0	6	4	4	4
FBgn0014465	X	P	Head	2.458	1.85039	0.025897	0.079306	1	5	4	1	1
FBgn0000358	3L	P	Head	2.39858	1.18405	0	0	0	6	3	1	1
FBgn0034766	2R	P	Head	2.84308	1.78496	0	0	2	4	3	2	1
FBgn0051157	3R	P	Head	5.44261	3.38205	0.045907	0	2	4	2	2	2
FBgn0037488	3R	P	Head	1.58455	0.911172	0	0	2	4	2	2	0
FBgn0014466	X	P	Head	1.03099	0.442925	0	0	2	4	2	1	0
FBgn0050395	2R	P	Head	12.1838	3.95581	0	0	5	1	1	1	1
FBgn0030313	X	P	Head	10.3516	6.92543	0	0	3	3	1	1	1
FBgn0034957	2R	P	Head	7.75471	5.72317	0.055405	0	5	1	1	1	1
FBgn0000359	X	P	Head	7.08831	0.03283	0	0	4	2	1	1	1
FBgn0264714	2R	P	Head	6.56804	1.11425	0	0	5	1	1	1	1
FBgn0000360	X	P	Head	4.61791	0.060959	0	0	3	3	1	1	1
FBgn0040684	3R	P	Head	4.5821	0.340029	0	0	5	1	1	1	1
FBgn0000356	3L	P	Head	3.07539	0	0	0.071257	5	1	1	1	0
FBgn0003015	3R	P	Head	2.33522	0.0869075	0.081687	0	4	2	1	1	1
FBgn0263707	2R	P	Head	2.13629	0	0	0	5	1	1	1	0
FBgn0261567	2L	P	Head	1.38536	0.479479	0	0	3	3	1	1	0
FBgn0030544	X	P	Head	1.02886	1.21551	0	0	2	4	1	1	0
FBgn0038470	3R	P	SG	1.4851	0.842166	0.049021	0.0228455	0	6	3	2	0
FBgn0032024	2L	P	SG	3.08618	0.648314	0	0.009935	3	3	2	2	2
FBgn0036228	3L	P	SG	10.3794	0.093617	0	0.057355	5	1	1	1	1
FBgn0052304	3L	P	SG	9.65335	0.03485	0	0	5	1	1	1	1
FBgn0037563	3R	P	SG	8.20539	0.046464	0.0716345	0.0453135	4	2	1	1	1
FBgn0036094	3L	P	SG	7.44466	4.88527	0.0343785	0.043691	2	4	1	1	1
FBgn0035325	3L	P	SG	5.39303	0.0653475	0.035143	0.052371	5	1	1	1	1
FBgn0036881	3L	P	SG	2.66927	2.39024	0	0	4	2	1	1	1
FBgn0054045	2R	P	SG	2.51145	0	0	0	5	1	1	1	0
FBgn0039002	3R	P	SG	2.43224	0.316714	0	0	5	1	1	1	0
FBgn0032663	2L	P	SG	1.46685	0.039486	0.064505	0.043389	4	2	1	1	0
FBgn0030187	X	P	SG	0.868119	0.409108	0	0.039986	3	3	1	1	0
FBgn0265158	3R	F	Testis	83.762	76.2172	0	0	0	6	6	6	6
FBgn0037291	3R	F	Testis	10.2019	10.9691	0.04041	0.052551	0	6	6	6	6
FBgn0039039	3R	F	Testis	5.66512	7.75582	0.065369	0.029609	0	6	6	6	5
FBgn0040318	3L	P	Testis	6.64567	7.03317	0.0476725	0.0346185	0	6	5	5	4
FBgn0264362	2L	P	Testis	2.92049	3.07467	0	0	0	6	5	3	2
FBgn0036677	3L	P	Testis	1.34513	1.70334	0.048645	0.022475	0	6	5	1	0
FBgn0263020	2R	P	Testis	4.65405	2.5117	0	0	1	5	5	5	3
FBgn0040279	3R	P	Testis	3.16016	2.22587	0	0	1	5	5	4	1
FBgn0052774	X	P	Testis	15.4552	8.18659	0.053308	0.026488	0	6	4	4	4
FBgn0263320	2L	P	Testis	37.9198	43.0384	0	0	0	6	3	3	3
FBgn0013725	2R	P	Testis	16.5674	10.1065	0.053769	0.021072	3	3	3	3	3
FBgn0035315	3L	P	Testis	6.1421	4.62444	0	0	3	3	3	2	2
FBgn0039771	3R	P	Testis	3.71477	2.08159	0	0	3	3	3	2	1
FBgn0039027	3R	P	Testis	3.95627	1.9544	0	0	3	3	2	2	2
FBgn0053349	2R	P	Testis	2.42875	1.21677	0.0607945	0.028926	2	4	2	2	2
FBgn0036349	3L	P	Testis	0.822242	0.381455	0	0	1	5	2	1	0
FBgn0034131	2R	P	Testis	1.42559	0.194974	0	0	4	2	1	1	0
									70	48	50	22

[truncated: 3 more sheets: Table S11, Table S12, Table S13]
